# Supplementary material for: Designing safer oral drugs
Source: Royal Society of Chemistry journal article supplement (doi:10.1039/c6md00706f), 2017-01-01
Supplement: c6md00706f1.xlsx [file c6md00706f1.xlsx]

## Sheet: Sheet1
Reference	Molecule Name	Cp,effective (mg/L)	Cp,NOAEL (mg/L)	Cp,NOAEL (nM)	Aeffective,ss (mg/kg)	ANOAEL,ss (mg/kg)	Chembl Id	Smiles	Oral drug	Vss Human (L/kg)	ISL Vss Human (L/kg)	Charge Type	MolWt	pka_a1	pka_a2	pka_b1	pka_b2	(ACD) LogP	(ACD) LogD7.4	(ChEMBL) LogP	(ChEMBL) LogD7.4
1	acamprosate	0.25	1	5518.37	0.099246	0.396984	CHEMBL1201293	CC(=O)NCCCS(=O)(=O)O	1		0.396984	acidic	181.213	1.7				-2.68	-6.18
2	acenocoumarol	0.03	0.1	283.022	0.0136997	0.0456656	CHEMBL397420	CC(=O)CC(C1=C(O)c2ccccc2OC1=O)c3ccc(cc3)[N+](=O)[O-]	0		0.456656	acidic	353.33	4.5				2.97	0.17
3	acetazolamide	4	25	112485	1.48	9.25	CHEMBL20	CC(=O)Nc1nnc(s1)S(=O)(=O)N	1	0.37	0.354037	neutral	222.251	7.44				-0.26	-0.69		-0.78
4	acetohexamide	20	500	1.5413e+06	3.86181	96.5453	CHEMBL1589	CC(=O)c1ccc(cc1)S(=O)(=O)NC(=O)NC2CCCCC2	1		0.193091	acidic	324.402	4.32				2.44	0.46		-0.49
5	acetylsalicylic acid	20	300	1.6652e+06	3.63318	54.4977	CHEMBL25	CC(=O)Oc1ccccc1C(=O)O	1	0.181659	0.325937	acidic	180.159	3.48				1.4	-1.68
6	agomelatine	0.007	0.6	2466.03	0.0135755	1.16362	CHEMBL10878	COc1ccc2cccc(CCNC(=O)C)c2c1	0		1.93936	neutral	243.306					2.47	2.47
7	aldrin		0.0035	9.5913	0	0.0173547	CHEMBL195953	ClC1=C(Cl)C2(Cl)C3C4CC(C=C4)C3C1(Cl)C2(Cl)Cl	0		4.95849	neutral	364.914					6.23	6.23
8	alimemazine	0.05	0.5	1675.29	1.14637	11.4637	CHEMBL1713082	CC(CN(C)C)CN1c2ccccc2Sc3ccccc13	1		22.9275	basic	298.455			9.34		5.04	3.14
9	allobarbital	2	10	48026.8	1.34011	6.70053	CHEMBL267719	C=CCC1(CC=C)C(=O)NC(=O)NC1=O	0		0.670053	neutral	208.217	7.67				0.92	0.73
10	alprazolam	0.005	0.1	323.864	0.00375496	0.0750992	CHEMBL661	Cc1nnc2CN=C(c3ccccc3)c4cc(Cl)ccc4n12	1	0.750992	0.857289	neutral	308.772					1.92	1.92		1.98
11	alprenolol	0.025	1	4010.36	0.0812217	3.24887	CHEMBL266195	CC(C)NCC(O)COc1ccccc1CC=C	0	3.24887	3.54388	basic	249.354			9.43		2.91	0.81	2.65	0.99
12	amantadine	0.06	1	6611.44	0.396	6.6	CHEMBL660	NC12CC3CC(CC(C3)C1)C2	1	6.6	6.90282	basic	151.253			10.76		2.44	-0.47		-0.98
13	aminobenzoic acid	300	600	4.37515e+06	82.0723	164.145	CHEMBL542	Nc1ccc(cc1)C(=O)O	0		0.273574	acidic	137.138	4.86				0.68	-1.76	0.83
14	amiodarone	0.5	2.5	3874.05	31.7656	158.828	CHEMBL633	CCCCc1oc2ccccc2c1C(=O)c3cc(I)c(OCCN(CC)CC)c(I)c3	1	63.5312	39.2764	basic	645.319			9.37		7.82	5.87
15	amisulpride	0.1	0.64	1732.13	0.58	3.712	CHEMBL243712	CCN1CCCC1CNC(=O)c2cc(c(N)cc2OC)S(=O)(=O)CC	0	5.8	4.54715	basic	369.487			8.97		1.5	-0.33
16	amitriptyline	0.05	0.5	1802.38	0.424882	4.24882	CHEMBL629	CN(C)CCC=C1c2ccccc2CCc3ccccc13	1	8.49765	15.8048	basic	277.411			9.18		4.41	2.65
17	amlodipine	0.003	0.088	215.221	0.0499797	1.46607	CHEMBL1491	CCOC(=O)C1=C(COCCN)NC(=C(C1c2ccccc2Cl)C(=O)OC)C	1	16.6599	10.193	basic	408.882			8.97		3.01	1.5
18	amobarbital	1	5	22096.9	1.05	5.25	CHEMBL267894	CCC1(CCC(C)C)C(=O)NC(=O)NC1=O	0	1.05	0.973274	neutral	226.276	7.92				2.18	2.06
19	amoxapine	0.18	3	9560.6	0.322863	5.38106	CHEMBL1113	Clc1ccc2Oc3ccccc3N=C(N4CCNCC4)c2c1	1		1.79369	basic	313.788			8.62		2.93	1.79		2.28
20	amphetamine	0.02	0.2	1479.18	0.122	1.22	CHEMBL405	CC(N)Cc1ccccc1	1	6.1	4.9073	basic	135.21			9.94		1.79	-0.65
21	aprindine	1	2	6201.63	26.6688	53.3376	CHEMBL1213033	CCN(CC)CCCN(C1Cc2ccccc2C1)c3ccccc3	0		26.6688	basic	322.496			10.35		5.68	2.96
22	aprobarbital	4	30	142699	3.10944	23.3208	CHEMBL7863	CC(C)C1(CC=C)C(=O)NC(=O)NC1=O	0		0.777361	neutral	210.233	7.81				1.28	1.14
23	aripiprazole	0.15	1	2230.18	0.735	4.9	CHEMBL1112	Clc1cccc(N2CCN(CCCCOc3ccc4CCC(=O)Nc4c3)CC2)c1Cl	1	4.9	6.30063	basic	448.394			7.67		3.76	3.54
24	asenapine	0.002	0.01	34.9927	0.0143424	0.071712	CHEMBL1201756	CN1C[C@@H]2[C@@H](C1)c3cc(Cl)ccc3Oc4ccccc24	0		7.1712	basic	285.774			9.5		2.81	0.74
25	astemizole	0.002	14	30529	0.0126148	88.3037	CHEMBL296419	COc1ccc(CCN2CCC(CC2)Nc3nc4ccccc4n3Cc5ccc(F)cc5)cc1	0		6.30741	basic	458.581			8.68		5.52	4.13
26	atenolol	0.1	2	7509.17	0.0939947	1.87989	CHEMBL24	CC(C)NCC(O)COc1ccc(CC(=O)N)cc1	1	0.939947	1.36527	basic	266.341			9.43		0.34	-1.76	0.22
27	atomoxetine	0.2	2	7832.05	0.17	1.7	CHEMBL641	CNCC[C@@H](Oc1ccccc1C)c2ccccc2	1	0.85	1.69073	basic	255.361			10.15		3.36	0.77		1.2
28	atropine	0.002	0.03	103.672	0.00488713	0.0733069	CHEMBL517712	CN1[C@@H]2CC[C@H]1C[C@H](C2)OC(=O)C(CO)c3ccccc3	1	2.44356	3.00843	basic	289.375			9.98		1.38	-1.09		-0.66
29	baclofen	0.08	1.1	5148.27	0.0211949	0.29143	CHEMBL701	NCC(CC(=O)O)c1ccc(Cl)cc1	1		0.264937	zwitterion	213.664	4.05		10.33		0.78	-1.72
30	barbital	2	20	108581	1.47966	14.7966	CHEMBL444	CCC1(CC)C(=O)NC(=O)NC1=O	0		0.739829	neutral	184.195	7.92				0.8	0.69
31	benperidol	0.001	0.02	52.4314	0.0038	0.076	CHEMBL297302	Oc1nc2ccccc2n1C3CCN(CCCC(=O)c4ccc(F)cc4)CC3	0	3.8	4.61458	basic	381.451			8.82		4.33	1.31
32	benzonatate		2.5	4140.79	0	8.65516	CHEMBL1374379	CCCCNc1ccc(cc1)C(=O)OCCOCCOCCOCCOCCOCCOCCOCCOCCOC	1		3.46206	neutral	603.75					1.84	1.84
33	benzphetamine	0.025	0.5	2088.89	0.147614	2.95229	CHEMBL1201358	CC(Cc1ccccc1)N(C)Cc2ccccc2	1		5.90457	basic	239.362			8.88		3.84	2.36
34	benztropine	0.01	0.05	162.635	0.193556	0.96778	CHEMBL1201203	CN1[C@@H]2CC[C@H]1C[C@H](C2)OC(c3ccccc3)c4ccccc4	1		19.3556	basic	307.437			10.54		4.03	1.21		1.49
35	bornaprine	0.0007	0.014	42.4907	0.00606588	0.121318	CHEMBL2104596	CCN(CC)CCCOC(=O)C1(C[C@@H]2CC[C@H]1C2)c3ccccc3	0		8.66555	basic	329.484			9.5		3.52	3.52
36	brallobarbital	4	8	27863.6	2.84521	5.69041	CHEMBL2106093	BrC(=C)CC1(CC=C)C(=O)NC(=O)NC1=O	0		0.711302	neutral	287.113	8.23				2.88	2.86
37	brodifacoum		0.02	38.2098	0	0.0455516	CHEMBL233451	OC1=C(C2CC(Cc3ccccc23)c4ccc(cc4)c5ccc(Br)cc5)C(=O)Oc6ccccc16	0		2.27758	acidic	523.426	4.5				8.17	5.37
38	bromadiolon		0.02	37.9209	0	0.0156844	CHEMBL1165553	OC(CC(C1=C(O)c2ccccc2OC1=O)c3ccccc3)c4ccc(cc4)c5ccc(Br)cc5	0		0.784222	acidic	527.414	4.5				6.83	4.03
39	bromazepam	0.05	0.3	948.893	0.0439744	0.263847	CHEMBL277062	Brc1ccc2NC(=O)CN=C(c3ccccn3)c2c1	0	0.879488	1.00343	neutral	316.158					2.28	2.28
40	bromisoval	10	30	134487	7.53287	22.5986	CHEMBL1515611	CC(C)C(Br)C(=O)NC(=O)N	0		0.753287	neutral	223.07					1.06	1.05
41	bromocriptine	0.0001	0.008	12.2211	9.84911e-05	0.00787929	CHEMBL493	CC(C)C[C@@H]1N2C(=O)[C@](NC(=O)[C@H]3CN(C)[C@@H]4Cc5c(Br)[nH]c6cccc(C4=C3)c56)(O[C@@]2(O)[C@@H]7CCCN7C1=O)C(C)C	1		0.984911	basic	654.606			7.5		8.6	8.55
42	bromoxynil		20	72224.3	0	30.675	CHEMBL453905	Oc1c(Br)cc(cc1Br)C#N	0		1.53375	acidic	276.915	4.78				2.85	0.34
43	bromperidol	0.012	0.03	71.3739	0.0998575	0.249644	CHEMBL28218	OC1(CCN(CCCC(=O)c2ccc(F)cc2)CC1)c3ccc(Br)cc3	0		8.32146	basic	420.322			8.04		4.03	3.2
44	brompheniramine	0.005	0.2	626.476	0.0347164	1.38866	CHEMBL811	CN(C)CCC(c1ccc(Br)cc1)c2ccccn2	1		6.94329	basic	319.246			9.33		3.24	1.3
45	brotizolam	0.001	0.02	50.8005	0.00075	0.015	CHEMBL32479	Cc1nnc2CN=C(c3ccccc3Cl)c4cc(Br)sc4n12	0	0.75	1.04711	neutral	393.697					2.46	2.46
46	buflomedil	0.2	15	48797.9	0.26	19.5	CHEMBL188921	COc1cc(OC)c(C(=O)CCCN2CCCC2)c(OC)c1	0	1.3	1.71767	basic	307.39			10.16		3.13	0.54
47	bupivacaine	0.25	2	6933.97	0.197618	1.58094	CHEMBL1098	CCCCN1CCCCC1C(=O)Nc2c(C)cccc2C	0	0.79047	1.383	basic	288.435			8.13		3.31	2.92
48	buprenorphine	0.0005	0.03	64.1505	0.00245	0.147	CHEMBL560511	CO[C@]12CC[C@@]3(C[C@@H]1[C@](C)(O)C(C)(C)C)[C@H]4Cc5ccc(O)c6O[C@@H]2[C@]3(CCN4CC7CC7)c56	0	4.9	3.43905	basic	467.65			8.31		2.83	1.86
49	bupropion	0.01	1.2	5005.3	0.0335544	4.02653	CHEMBL894	CC(NC(C)(C)C)C(=O)c1cccc(Cl)c1	1		3.35544	basic	239.746			8		2.32	2.13		2.12
50	buspirone	0.001	0.008	20.7516	0.00224101	0.0179281	CHEMBL49	O=C1CC2(CCCC2)CC(=O)N1CCCCN3CCN(CC3)c4ncccn4	1		2.24101	basic	385.512			7.72		1.59	1.24		2.19
51	butalbital	1	10	44591.1	0.869724	8.69724	CHEMBL454	CC(C)CC1(CC=C)C(=O)NC(=O)NC1=O	1		0.869724	neutral	224.26	7.78				1.79	1.64		1.48
52	butriptyline	0.07	0.4	1363.08	1.75767	10.0438	CHEMBL2110816	CC(CC1c2ccccc2CCc3ccccc13)CN(C)C	0		25.1096	neutral	293.454			7.17		-0.43	-3.32
53	cabergoline	5.8e-05	0.00039	0.863567	0.000127962	0.000860432	CHEMBL1201087	CCNC(=O)N(CCCN(C)C)C(=O)[C@@H]1C[C@H]2[C@@H](Cc3c[nH]c4cccc2c34)N(CC=C)C1	1		2.20624	basic	451.615			9.41	8.2	2.55	0.68
54	caffeine	2	15	77242.3	1.23585	9.26884	CHEMBL113	CN1C(=O)N(C)c2ncn(C)c2C1=O	1	0.617923	0.553318	neutral	194.194					-0.63	-0.63	-0.07	-0.03
55	camazepam	0.1	2	5378.89	0.03788	0.757601	CHEMBL1095282	CN(C)C(=O)OC1N=C(c2ccccc2)c3cc(Cl)ccc3N(C)C1=O	0		0.3788	neutral	371.824					3.11	3.11
56	camphor		0.3	1970.61	0	1.15273	CHEMBL504760	CC1(C)[C@@H]2CC[C@@]1(C)C(=O)C2	0		3.84242	neutral	152.237					2.09	2.09
57	captopril	0.05	5	23010.7	0.0375	3.75	CHEMBL1560	C[C@H](CS)C(=O)N1CCC[C@H]1C(=O)O	1	0.75	0.501236	acidic	217.29	3.45				1.99	-1.46
58	carbamazepine	2	10	42323.7	2.8	14	CHEMBL108	NC(=O)N1c2ccccc2C=Cc3ccccc13	1	1.4	1.25049	neutral	236.274					1.9	1.9	2.45	1.65
59	carbaryl		5	24847.8	0	6.03408	CHEMBL46917	CNC(=O)Oc1cccc2ccccc12	0		1.20682	neutral	201.225					2.34	2.34
60	carbidopa	0.02	0.4	1768.1	0.0101476	0.202952	CHEMBL1200748	C[C@@](Cc1ccc(O)c(O)c1)(NN)C(=O)O	1		0.507379	zwitterion	226.232	3.4		7.76		-1.75	-4.32
61	carisoprodol	10	30	115237	10.7117	32.135	CHEMBL1233	CCCC(C)(COC(=O)N)COC(=O)NC(C)C	1		1.07117	neutral	260.334					2.1	2.1		2.01
62	cetirizine	0.02	2	5142.78	0.00657853	0.657853	CHEMBL1000	OC(=O)COCCN1CCN(CC1)C(c2ccccc2)c3ccc(Cl)cc3	1		0.328927	acidic	388.895	3.46		6.71		1.62	-1.45		1.27
63	chloramphenicol	5	25	77367.8	4.7	23.5	CHEMBL130	OC[C@@H](NC(=O)C(Cl)Cl)[C@H](O)c1ccc(cc1)[N+](=O)[O-]	1	0.94	0.503164	neutral	323.132					1.1	1.1	1.14	1.15
64	chlordane		0.0025	6.1008	0	0.0115364	CHEMBL196537	ClC1CC2C(C1Cl)C3(Cl)C(=C(Cl)C2(Cl)C3(Cl)Cl)Cl	0		4.61455	neutral	409.782					5.89	5.89
65	chlordecone		0.5	1019.08	0	2.16875	CHEMBL462576	ClC1(Cl)C2(Cl)C3(Cl)C4(Cl)C(=O)C5(Cl)C(Cl)(C1(Cl)C35Cl)C24Cl	0		4.33749	neutral	490.639					5.41	5.41
66	chlordiazepoxide	0.4	3.5	11676	0.110793	0.96944	CHEMBL451	CNC1=Nc2ccc(Cl)cc2C(=[N+]([O-])C1)c3ccccc3	1	0.276983	0.442329	neutral	299.761					2.49	2.49		2.41
67	chlormezanone	3	20	73061.8	3.05368	20.3579	CHEMBL1200714	CN1C(c2ccc(Cl)cc2)S(=O)(=O)CCC1=O	1		1.01789	neutral	273.741					0.48	0.48
68	chlorobutanol		75	422635	0	221.674	CHEMBL1439973	CC(C)(O)C(Cl)(Cl)Cl	0		2.95565	neutral	177.458					1.73	1.73
69	chlorophacinone		0.1	266.793	0	0.0903664	CHEMBL1874081	Clc1ccc(cc1)C(C(=O)C2C(=O)c3ccccc3C2=O)c4ccccc4	0		0.903664	acidic	374.823	2.61				3.52	1.02
70	chloroquine	0.02	1	3126.17	2.8	140	CHEMBL76	CCN(CC)CCCC(C)Nc1ccnc2cc(Cl)ccc12	1	140	7.29502	basic	319.88			10.47	8.08	4.41	1.59
71	chlorpromazine	0.03	1	3136.04	0.356675	11.8892	CHEMBL71	CN(C)CCCN1c2ccccc2Sc3ccc(Cl)cc13	1	11.8892	21.0049	basic	318.873			9.41		5.18	3.24		3.37
72	chlorpropamide	30	200	722687	5.7	38	CHEMBL498	CCCNC(=O)NS(=O)(=O)c1ccc(Cl)cc1	1	0.19	0.160547	acidic	276.745	4.69				2.3	0.32		-0.33
73	chlorprothixene	0.02	0.4	1266.35	0.281984	5.63969	CHEMBL908	CN(C)CC\C=C/1\c2ccccc2Sc3ccc(Cl)cc13	1		14.0992	basic	315.869			9.05		5.21	3.57
74	chlorpyrifos		0.2	570.465	0	0.333843	CHEMBL463210	CCOP(=S)(OCC)Oc1nc(Cl)c(Cl)cc1Cl	0		1.66921	neutral	350.591					5	5
75	chlortalidone	0.15	2	5903.68	0.585	7.8	CHEMBL1055	NS(=O)(=O)c1cc(ccc1Cl)C2(O)NC(=O)c3ccccc23	1	3.9	2.01882	neutral	338.772					0.7	0.7		0.97
76	chlortetracycline	1	30	62645.5	0.9	27	CHEMBL404520	CN(C)[C@H]1[C@@H]2C[C@H]3C(=C(O)[C@]2(O)C(=O)C(=C1O)C(=O)N)C(=O)c4c(O)ccc(Cl)c4[C@@]3(C)O	0	0.9	1.00385	zwitterion	478.885	4.5		11.01		1.32	-1.64
77	cibenzoline	0.2	0.5	1905.81	0.82	2.05	CHEMBL87045	C1CN=C(N1)C2CC2(c3ccccc3)c4ccccc4	0	4.1	5.40452	basic	262.356			10.82		3.49	1.51
78	cimetidine	0.25	30	118884	0.268913	32.2696	CHEMBL30	CN\C(=N/CCSCc1nc[nH]c1C)\NC#N	1	1.07565	1.09932	neutral	252.347			7.07		-0.07	-0.36	0.48
79	cinnarizine	0.04	7.4	20080.1	0.29583	54.7285	CHEMBL43064	C(\C=C\c1ccccc1)N2CCN(CC2)C(c3ccccc3)c4ccccc4	0		7.39574	neutral	368.524			7		5.03	4.86
80	ciprofloxacin	2.5	11.5	34706.8	5.00545	23.0251	CHEMBL8	OC(=O)C1=CN(C2CC2)c3cc(N4CCNCC4)c(F)cc3C1=O	1	2.00218	2.27064	zwitterion	331.347	6.13		8.57		1.63	-0.29		-0.96
81	citalopram	0.05	0.22	678.177	0.616224	2.71139	CHEMBL549	CN(C)CCCC1(OCc2cc(ccc12)C#N)c3ccc(F)cc3	1	12.3245	12.7749	basic	324.399			9.57		3.48	1.35		1.56
82	clenbuterol	0.0003	0.003	10.8227	0.000732906	0.00732906	CHEMBL49080	CC(C)(C)NCC(O)c1cc(Cl)c(N)c(Cl)c1	0		2.44302	basic	277.195			9.52		2.63	0.58
83	clobazam	0.03	0.5	1662.54	0.030583	0.509716	CHEMBL70418	CN1C(=O)CC(=O)N(c2ccccc2)c3cc(Cl)ccc13	1		1.01943	neutral	300.745					1.25	1.22
84	clomethiazole	0.1	2.8	17320.6	0.66	18.48	CHEMBL315795	Cc1ncsc1CCCl	0	6.6	5.34844	neutral	161.657					1.71	1.71
85	clomipramine	0.02	0.4	1270.41	0.32249	6.44981	CHEMBL415	CN(C)CCCN1c2ccccc2CCc3ccc(Cl)cc13	1	16.1245	27.6379	basic	314.86			9.46		4.94	2.95		3.36
86	clonazepam	0.004	0.1	316.74	0.0116	0.29	CHEMBL452	[O-][N+](=O)c1ccc2NC(=O)CN=C(c3ccccc3Cl)c2c1	1	2.9	1.37966	neutral	315.716					2.52	2.52		3.72
87	clonidine	0.001	0.009	39.1138	0.00235122	0.021161	CHEMBL134	Clc1cccc(Cl)c1NC2=NCCN2	1	2.35122	2.41131	basic	230.098			8.1		2.36	1.6	1.43
88	clopenthixol	0.002	0.1	249.392	0.0345348	1.72674	CHEMBL53904	OCCN1CCN(CC\C=C/2\c3ccccc3Sc4ccc(Cl)cc24)CC1	0		17.2674	neutral	400.975			7.03		3.91	3.68
89	clozapine	0.1	0.6	1835.81	0.331959	1.99175	CHEMBL42	CN1CCN(CC1)C2=Nc3cc(Cl)ccc3Nc4ccccc24	1	3.31959	4.26301	basic	326.831			7.64		3.94	3.53		3.08
90	cocaine	0.05	0.25	824.109	0.1	0.5	CHEMBL370805	COC(=O)[C@H]1[C@H](C[C@@H]2CC[C@H]1N2C)OC(=O)c3ccccc3	0	2	2.11614	basic	303.358			8.97		2.28	0.71
91	codeine	0.03	0.5	1670.17	0.105	1.75	CHEMBL485	COc1ccc2C[C@@H]3[C@@H]4C=C[C@H](O)[C@@H]5Oc1c2[C@]45CCN3C	1	3.5	4.17679	basic	299.37			8.24		1.39	0.46
92	colchicine	0.0003	0.005	12.5174	0.0015322	0.0255367	CHEMBL107	COC1=CC=C2C(=CC1=O)[C@H](CCc3cc(OC)c(OC)c(OC)c23)NC(=O)C	1	5.10733	4.32793	neutral	399.443					1.07	1.07		0.82
93	cyclizine	0.1	0.75	2815.44	0.700097	5.25073	CHEMBL648	CN1CCN(CC1)C(c2ccccc2)c3ccccc3	0		7.00097	basic	266.388			7.5		2.47	2.08
94	cyclobarbital	2	10	42324.3	1.95556	9.77778	CHEMBL268164	CCC1(C(=O)NC(=O)NC1=O)C2=CCCCC2	0		0.977778	neutral	236.271	8.03				1.5	1.41
95	cyclobenzaprine	0.003	0.4	1452.46	0.0348573	4.64764	CHEMBL669	CN(C)CCC=C1c2ccccc2C=Cc3ccccc13	1		11.6191	basic	275.395			9.15		6.19	4.45		2.83
96	dapsone	0.5	10	40272.7	0.415	8.3	CHEMBL1043	Nc1ccc(cc1)S(=O)(=O)c2ccc(N)cc2	1	0.83	0.840672	neutral	248.307					0.99	0.99		0.88
97	demoxepam	0.5	1	3487.75	0.494866	0.989732	CHEMBL1597677	[O-][N+]1=C(c2ccccc2)c3cc(Cl)ccc3NC(=O)C1	0		0.989732	neutral	286.718					0.73	0.73
98	desipramine	0.01	0.5	1876.96	0.173205	8.66025	CHEMBL72	CNCCCN1c2ccccc2CCc3ccccc13	1	17.3205	19.1831	basic	266.388			10.4		3.97	1.27	4.165	1.24
99	desvenlafaxine	0.1	0.6	2278.07	0.368846	2.21308	CHEMBL1118	CN(C)CC(c1ccc(O)cc1)C2(O)CCCCC2	1		3.68846	basic	263.381			9.33		1.74	0
100	dexfenfluramine	0.03	0.15	648.618	0.33	1.65	CHEMBL248702	CCN[C@@H](C)Cc1cccc(c1)C(F)(F)F	0	11	6.90546	basic	231.261			10.23		3.55	0.91
101	dexmethylphenidate	0.013	0.044	188.589	0.0351023	0.118808	CHEMBL827	COC(=O)[C@@H]([C@H]1CCCCN1)c2ccccc2	1		2.70018	basic	233.311			9.51		2.31	0.24
102	dextromethorphan	0.01	0.1	368.454	0.106782	1.06782	CHEMBL52440	COc1ccc2C[C@H]3[C@H]4CCCC[C@@]4(CCN3C)c2c1	1		10.6782	basic	271.404			9.13		3.89	2.17
103	dextromoramide	0.075	0.2	509.498	0.222491	0.59331	CHEMBL431928	CC(CN1CCOCC1)C(C(=O)N2CCCC2)(c3ccccc3)c4ccccc4	0		2.96655	neutral	392.543			6.9		2.53	2.42
104	dextropropoxyphene	0.05	0.6	1767.41	0.6	7.2	CHEMBL1213351	CCC(=O)O[C@@](Cc1ccccc1)([C@H](C)CN(C)C)c2ccccc2	1	12	11.4726	basic	339.479			9.2		4.1	2.32
105	diazepam	0.1	3	10535.7	0.113202	3.39607	CHEMBL12	CN1C(=O)CN=C(c2ccccc2)c3cc(Cl)ccc13	1	1.13202	1.28763	neutral	284.746					2.8	2.8	2.92	2.69
106	diazinon		0.05	164.283	0	0.0528347	CHEMBL388560	CCOP(=S)(OCC)Oc1cc(C)nc(n1)C(C)C	0		1.05669	neutral	304.352					3.77	3.77	3.3
107	diazoxide	10	50	216754	2.1	10.5	CHEMBL181	CC1=NS(=O)(=O)c2cc(Cl)ccc2N1	1	0.21	0.239588	neutral	230.676					1.19	1.18		1.05
108	dibenzepine	0.025	3	10662.5	0.050109	6.01308	CHEMBL99486	CN(C)CCN1C(=O)c2ccccc2Nc3ccccc13	0		2.00436	basic	281.359			8.78		3	1.54
109	2,4-dichlorophenoxyacetic acid		100	452409	0	22.0331	CHEMBL367623	OC(=O)COc1ccc(Cl)cc1Cl	0		0.220331	acidic	221.039	2.98				2.43	-1.24
110	diclofenac	0.5	50	168832	0.100941	10.0941	CHEMBL139	OC(=O)Cc1ccccc1Nc2c(Cl)cccc2Cl	1	0.201882	0.172513	acidic	296.153	3.89				4.55	1.44	4.51	1.08
111	dicoumarol	8	40	118942	3.80889	19.0445	CHEMBL1466	OC1=C(CC2=C(O)c3ccccc3OC2=O)C(=O)Oc4ccccc14	1		0.476111	acidic	336.299	4.2	8			2.05	-1		1.22
112	dicyclomine		0.2	646.216	0	1.39795	CHEMBL1123	CCN(CC)CCOC(=O)C1(CCCCC1)C2CCCCC2	1		6.98977	basic	309.494			9.24		4.64	2.82		3.72
113	dieldrin		0.15	393.791	0	0.753426	CHEMBL1873703	ClC1=C(Cl)[C@@]2(Cl)[C@H]3[C@H]4C[C@H]([C@@H]5O[C@H]45)[C@H]3[C@]1(Cl)C2(Cl)Cl	0		5.02284	neutral	380.913					4.48	4.48
114	diethylpropion	0.003	2	9741.79	0.00849774	5.66516	CHEMBL1194666	CCN(CC)C(C)C(=O)c1ccccc1	1		2.83258	basic	205.301			8.49		2.55	1.44		1.18
115	diflunisal	40	300	1.19904e+06	3.88	29.1	CHEMBL898	OC(=O)c1cc(ccc1O)c2ccc(F)cc2F	1	0.097	0.110521	acidic	250.2	2.94				3.65	0.51		0.59
116	digitoxin	0.01	0.03	39.2182	0.0044	0.0132	CHEMBL254219	C[C@H]1O[C@H](C[C@H](O)[C@@H]1O)O[C@H]2[C@@H](O)C[C@H](O[C@H]3[C@@H](O)C[C@H](O[C@H]4CC[C@@]5(C)[C@H](CC[C@@H]6[C@@H]5CC[C@]7(C)[C@H](CC[C@]67O)C8=CC(=O)OC8)C4)O[C@@H]3C)O[C@@H]2C	0	0.44	1.68011	neutral	764.95					2.74	2.74
117	digoxin	0.0005	0.0025	3.20123	0.00187159	0.00935795	CHEMBL1751	C[C@H]1O[C@H](C[C@H](O)[C@@H]1O)O[C@H]2[C@@H](O)C[C@H](O[C@H]3[C@@H](O)C[C@H](O[C@H]4CC[C@@]5(C)[C@H](CC[C@@H]6[C@@H]5C[C@@H](O)[C@]7(C)[C@H](CC[C@]67O)C8=CC(=O)OC8)C4)O[C@@H]3C)O[C@@H]2C	1	3.74318	1.686	neutral	780.949					1.29	1.29
118	dihydrocodeine	0.03	0.5	1659	0.166593	2.77655	CHEMBL1595	COc1ccc2C[C@@H]3[C@@H]4CC[C@H](O)[C@@H]5Oc1c2[C@]45CCN3C	1		5.55311	basic	301.386			8.43		0.61	-0.52
119	diltiazem	0.03	0.8	1929.91	0.104004	2.77345	CHEMBL23	COc1ccc(cc1)[C@@H]2Sc3ccccc3N(CCN(C)C)C(=O)[C@@H]2OC(=O)C	1	3.46681	2.70878	basic	414.527			8.08		4.73	3.36	2.8	1.99
120	dimethadione	350	1000	7.74503e+06	213.584	610.24	CHEMBL1099	CC1(C)OC(=O)NC1=O	0		0.61024	acidic	129.115	6.08				0.77	-0.49
121	diphenhydramine	0.05	1	3916.02	0.254341	5.08682	CHEMBL657	CN(C)CCOC(c1ccccc1)c2ccccc2	1	5.08682	5.04334	basic	255.361			8.76		3	1.63
122	dipipanone		0.2	572.217	0	2.37293	CHEMBL2111157	CCC(=O)C(CC(C)N1CCCCC1)(c2ccccc2)c3ccccc3	0		11.8646	basic	349.518			7.67		-0.22	-0.34
123	dipyridamole	0.1	4	7926.51	0.274647	10.9859	CHEMBL932	OCCN(CCO)c1nc(N2CCCCC2)c3nc(nc(N4CCCCC4)c3n1)N(CCO)CCO	1		2.74647	neutral	504.636			6.47		3.35	3.33		3.97
124	disopyramide	2	8	23565.2	1.04	4.16	CHEMBL517	CC(C)N(CCC(C(=O)N)(c1ccccc1)c2ccccn2)C(C)C	1	0.52	0.953016	basic	339.483			10.1		2.33	-0.07		-0.54
125	disulfiram	0.05	0.5	1686.04	0.235385	2.35385	CHEMBL964	CCN(CC)C(=S)SSC(=S)N(CC)CC	1		4.7077	neutral	296.552					3.82	3.82
126	donepezil	0.03	0.075	197.628	0.187136	0.467841	CHEMBL502	COc1cc2CC(CC3CCN(Cc4ccccc4)CC3)C(=O)c2cc1OC	1		6.23788	basic	379.5			8.84		3.91	2.47		2.41
127	dothiepin	0.02	0.3	1015.4	0.300454	4.50681	CHEMBL108947	CN(C)CC\C=C/1\c2ccccc2CSc3ccccc13	0		15.0227	basic	295.451			9.14		4.27	2.54
128	doxapram	1.5	9	23777.1	1.8	10.8	CHEMBL1754	CCN1CC(CCN2CCOCC2)C(C1=O)(c3ccccc3)c4ccccc4	0	1.2	2.09811	neutral	378.516			7.3		5.64	5.37
129	doxepin	0.01	0.5	1789.66	0.118491	5.92453	CHEMBL1628227	CN(C)CCC=C1c2ccccc2COc3ccccc13	1	11.8491	13.6853	basic	279.383			8.5		3.84	2.06		2.15
130	doxycycline	1	30	67500.7	0.69	20.7	CHEMBL1433	C[C@@H]1[C@H]2[C@H](O)[C@H]3[C@H](N(C)C)C(=C(C(=O)N)C(=O)[C@@]3(O)C(=C2C(=O)c4c(O)cccc14)O)O	1	0.69	0.918938	zwitterion	444.44	4.5		10.84		1.78	-1.1
131	doxylamine	0.05	1	3698.55	0.143073	2.86147	CHEMBL1004	CN(C)CCOC(C)(c1ccccc1)c2ccccn2	1		2.86147	basic	270.376			8.68		2.34	1.08		-0.2
132	duloxetine	0.03	0.24	806.932	0.186165	1.48932	CHEMBL1175	CNCC[C@H](Oc1cccc2ccccc12)c3cccs3	1		6.20549	basic	297.423			10.02		4.81	2.31		2.09
133	dyphylline	6.5	40	157328	3.3841	20.8252	CHEMBL1752	CN1C(=O)N(C)c2ncn(CC(O)CO)c2C1=O	1	0.52063	0.539734	neutral	254.246					-1.25	-1.25		-1.25
134	emetine	0.005	0.5	1040.26	0.0237258	2.37258	CHEMBL50588	CC[C@H]1CN2CCc3cc(OC)c(OC)cc3[C@@H]2C[C@@H]1C[C@H]4NCCc5cc(OC)c(OC)cc45	0		4.74515	basic	480.649			8.92	7.4	3.82	1.54
135	enprofylline	1	10	51494.9	0.63	6.3	CHEMBL279898	CCCN1C(=O)NC(=O)c2[nH]cnc12	0	0.63	0.566127	neutral	194.194					0.57	0.57
136	ephedrine	0.02	1	6051.95	0.0539261	2.69631	CHEMBL211456	CN[C@@H](C)[C@H](O)c1ccccc1	0		2.69631	basic	165.236			9.38		1.08	-0.93	1.245	-1.945
137	ergotamine	0.00036	0.00082	1.40973	0.00106982	0.00243682	CHEMBL442	CN1C[C@@H](C=C2[C@H]1Cc3c[nH]c4cccc2c34)C(=O)N[C@]5(C)O[C@@]6(O)[C@@H]7CCCN7C(=O)[C@H](Cc8ccccc8)N6C5=O	1	2.97173	1.49964	neutral	581.673			6.94		7.37	7.24
138	erythromycin	0.5	12	16350.2	0.475	11.4	CHEMBL532	CC[C@H]1OC(=O)[C@H](C)[C@@H](O[C@H]2C[C@@](C)(OC)[C@@H](O)[C@H](C)O2)[C@H](C)[C@@H](O[C@@H]3O[C@H](C)C[C@@H]([C@H]3O)N(C)C)[C@](C)(O)C[C@@H](C)C(=O)[C@H](C)[C@@H](O)[C@]1(C)O	1	0.95	1.61948	basic	733.937			8.16		1.91	1.16
139	escitalopram	0.015	0.16	493.22	0.191624	2.04399	CHEMBL1508	CN(C)CCC[C@]1(OCc2cc(ccc12)C#N)c3ccc(F)cc3	1		12.7749	basic	324.399			9.57		3.48	1.35		1.48
140	ethambutol	0.5	6	29366.6	0.85	10.2	CHEMBL44884	CC[C@@H](CO)NCCN[C@@H](CC)CO	1	1.7	1.91473	basic	204.314			9.59		-0.29	-2.57
141	ethchlorvynol	0.5	20	138312	1.58579	63.4314	CHEMBL591	CCC(O)(\C=C\Cl)C#C	1		3.17157	neutral	144.601					1.19	1.19
142	ethinamate	1.5	50	299029	1.89991	63.3302	CHEMBL1576	NC(=O)OC1(CCCCC1)C#C	1		1.2666	neutral	167.208					1.53	1.53
143	ethosuximide	30	150	1.06255e+06	26.5312	132.656	CHEMBL696	CCC1(C)CC(=O)NC1=O	1		0.884374	neutral	141.17					0.25	0.25		0.23
144	etidocaine	0.5	1.6	5788.21	0.630921	2.01895	CHEMBL492	CCCN(CC)C(CC)C(=O)Nc1c(C)cccc1C	0		1.26184	basic	276.424			8.07		3.57	3.16
145	etizolam	0.008	0.03	87.5005	0.00995817	0.0373431	CHEMBL1289779	CCc1cc2C(=NCc3nnc(C)n3c2s1)c4ccccc4Cl	0		1.24477	neutral	342.855					2.2	2.2		2.52
146	famotidine	0.02	0.42	1244.61	0.024	0.504	CHEMBL902	NC(=N)Nc1nc(CSCCC(=N)NS(=O)(=O)N)cs1	1	1.2	0.71325	neutral	337.456	7.35		6.89		-1.66	-2.83		-0.6
147	felbamate	30	150	629609	23.2032	116.016	CHEMBL1094	NC(=O)OCC(COC(=O)N)c1ccccc1	1		0.773438	neutral	238.243					0.73	0.73
148	felodipine	0.001	0.01	26.0241	0.00715707	0.0715707	CHEMBL1480	CCOC(=O)C1=C(C)NC(=C(C1c2cccc(Cl)c2Cl)C(=O)OC)C	1	7.15707	5.9356	neutral	384.259					4.76	4.76
149	fenfluramine	0.04	0.5	2162.06	0.276218	3.45273	CHEMBL87493	CCNC(C)Cc1cccc(c1)C(F)(F)F	0		6.90546	basic	231.261			10.23		3.55	0.91
150	flecainide	0.2	1	2413.44	1.09343	5.46717	CHEMBL652	FC(F)(F)COc1ccc(OCC(F)(F)F)c(c1)C(=O)NCC2CCCCN2	1	5.46717	4.37435	basic	414.346			9.69		3.19	1.05		1.13
151	fluconazole	1	20	65300.6	0.67082	13.4164	CHEMBL106	OC(Cn1cncn1)(Cn2cncn2)c3ccc(F)cc3F	1	0.67082	0.742355	neutral	306.276					0.45	0.45		0.48
152	flucytosine	20	100	774629	13.6	68	CHEMBL1463	NC1=C(F)C=NC(=O)N1	1	0.68	0.579737	neutral	129.094					-1.4	-1.85
153	flumazenil	0.01	0.5	1648.57	0.00889592	0.444796	CHEMBL407	CCOC(=O)c1ncn2c1CN(C)C(=O)c3cc(F)ccc23	0	0.889592	0.892392	neutral	303.293					2.15	2.15		1.1
154	flunarizine	0.025	0.3	741.649	0.118993	1.42792	CHEMBL30008	Fc1ccc(cc1)C(N2CCN(C\C=C\c3ccccc3)CC2)c4ccc(F)cc4	0		4.75973	neutral	404.504			6.99		5.59	5.44
155	flunitrazepam	0.005	0.05	159.598	0.0095	0.095	CHEMBL13280	CN1C(=O)CN=C(c2ccccc2F)c3cc(ccc13)[N+](=O)[O-]	0	1.9	1.45221	neutral	313.288					2.13	2.13		2.1
156	5-fluorouracil	0.05	0.4	3075.08	0.0115	0.092	CHEMBL185	FC1=CNC(=O)NC1=O	0	0.23	0.265829	acidic	130.078	6.73				-0.65	-1.64
157	fluoxetine	0.12	1	3232.78	0.374776	3.12313	CHEMBL41	CNCCC(Oc1ccc(cc1)C(F)(F)F)c2ccccc2	1		3.12313	basic	309.331			10.05		3.93	1.41		1.92
158	flupenthixol	0.001	0.015	34.5203	0.00581179	0.0871769	CHEMBL54661	OCCN1CCN(CC\C=C/2\c3ccccc3Sc4ccc(cc24)C(F)(F)F)CC1	0		5.81179	neutral	434.527			7.05		3.67	3.44
159	fluphenazine	0.001	0.015	34.2833	0.00593637	0.0890456	CHEMBL726	OCCN1CCN(CCCN2c3ccccc3Sc4ccc(cc24)C(F)(F)F)CC1	1		5.93637	basic	437.531			8		3.92	3.58		3.8
160	flupirtine	0.5	3	9857.88	0.55	3.3	CHEMBL255044	CCOC(=O)Nc1ccc(NCc2ccc(F)cc2)nc1N	0	1.1	1.10294	neutral	304.325					1.6	1.6		2.22
161	flurazepam	0.02	0.2	515.615	0.0784429	0.784429	CHEMBL968	CCN(CC)CCN1C(=O)CN=C(c2ccccc2F)c3cc(Cl)ccc13	1		3.92215	basic	387.886			9.79		4.84	2.49		2.38
162	fluspirilen	0.0001	0.0044	9.2518	0.000605167	0.0266273	CHEMBL46516	Fc1ccc(cc1)C(CCCN2CCC3(CC2)N(CNC3=O)c4ccccc4)c5ccc(F)cc5	0		6.05167	basic	475.583			9.21		5.5	3.71
163	fluvoxamine	0.06	0.5	1570.65	0.101036	0.84197	CHEMBL814	COCCCC\C(=N/OCCN)\c1ccc(cc1)C(F)(F)F	1		1.68394	basic	318.339			9.39		3.71	1.75
164	fosphenytoin		30	82809.3	0	15.9587	CHEMBL1201336	OP(=O)(O)OCN1C(=O)NC(C1=O)(c2ccccc2)c3ccccc3	0		0.531956	acidic	362.278	1.74				-1.06	-6.08
165	furosemide	2	25	75586	0.24649	3.08112	CHEMBL35	NS(=O)(=O)c1cc(C(=O)O)c(NCc2occc2)cc1Cl	1	0.123245	0.131406	acidic	330.749	3.63				2.3	-0.82	2.295	-0.9
166	gabapentin	0.5	25	145994	0.355	17.75	CHEMBL940	NCC1(CC(=O)O)CCCCC1	1	0.71	0.49123	zwitterion	171.24	4.73		10.27		1.08	-1.42
167	galantamine	0.03	0.09	313.197	0.0713597	0.214079	CHEMBL659	COc1ccc2CN(C)CC[C@@]34C=C[C@H](O)C[C@@H]3Oc1c24	1	2.37866	3.69379	basic	287.359			8.21		-0.05	-0.69
168	ganciclovir	0.29	3	11753.9	0.29	3	CHEMBL182	NC1=Nc2c(ncn2COC(CO)CO)C(=O)N1	1	1	0.851582	neutral	255.234					-1.61	-1.61
169	glibenclamide	0.05	0.6	1214.54	0.00482028	0.0578434	CHEMBL472	COc1ccc(Cl)cc1C(=O)NCCc2ccc(cc2)S(=O)(=O)NC(=O)NC3CCCCC3	1	0.0964057	0.117458	acidic	494.013	5.3				3.08	1.14		2.23
170	glipizide	0.1	2	4488.88	0.016	0.32	CHEMBL1073	Cc1cnc(cn1)C(=O)NCCc2ccc(cc2)S(=O)(=O)NC(=O)NC3CCCCC3	1	0.16	0.137369	acidic	445.545	5.25				1.88	0.05		0.31
171	glutethimide	0.2	10	46026.1	0.223163	11.1582	CHEMBL1102	CCC1(CCC(=O)NC1=O)c2ccccc2	1		1.11582	neutral	217.268					1.75	1.75
172	haloperidol	0.001	0.05	133.024	0.0176603	0.883015	CHEMBL54	OC1(CCN(CCCC(=O)c2ccc(F)cc2)CC1)c3ccc(Cl)cc3	1	17.6603	8.28544	basic	375.871			8.75		3.76	2.93		2.67
173	heptabarbital	0.5	8	31961.9	0.485751	7.77202	CHEMBL468837	CCC1(C(=O)NC(=O)NC1=O)C2=CCCCCC2	0		0.971502	neutral	250.298	7.77				2.03	1.88
174	hexapropymate	2	10	55177	2.79137	13.9569	CHEMBL2104292	NC(=O)OC1(CC#C)CCCCC1	0		1.39569	neutral	181.235					4.77	4.77
175	hexobarbital	1	10	42324.3	1.1	11	CHEMBL7728	CN1C(=O)NC(=O)C(C)(C2=CCCCC2)C1=O	0	1.1	1.03034	neutral	236.271	7.99				1.46	1.36		1.5
176	hydrocodone	0.01	0.1	334.035	0.0536362	0.536362	CHEMBL1457	COc1ccc2C[C@@H]3[C@@H]4CCC(=O)[C@@H]5Oc1c2[C@]45CCN3C	1		5.36362	basic	299.37			8.52		2.57	1.42
177	hydromorphone	0.005	0.1	350.455	0.0215	0.43	CHEMBL398707	CN1CC[C@@]23[C@H]4CCC(=O)[C@@H]2Oc5c(O)ccc(C[C@@H]14)c35	1	4.3	4.79041	basic	285.343			8.53		2.13	1.08
178	hydroxychloroquine		0.5	1488.63	0	350	CHEMBL1535	CCN(CCO)CCCC(C)Nc1ccnc2cc(Cl)ccc12	1	700	3.91515	basic	335.879			9.7	8.3	3.53	2		0.77
179	hydroxyzine	0.05	0.1	266.729	0.250347	0.500694	CHEMBL896	OCCOCCN1CCN(CC1)C(c2ccccc2)c3ccc(Cl)cc3	1		5.00694	basic	374.912			8		2.32	2.25		3.08
180	ibuprofen	15	200	969532	2.25	30	CHEMBL521	CC(C)Cc1ccc(cc1)C(C)C(=O)O	1	0.15	0.138146	acidic	206.285	4.41				3.5	0.58	3.5
181	iloperidone	0.005	0.02	46.8946	0.0260998	0.104399	CHEMBL14376	COc1cc(ccc1OCCCN2CCC(CC2)c3noc4cc(F)ccc34)C(=O)C	1		5.21996	basic	426.488			8.43		3.38	2.31
182	imipramine	0.05	0.5	1783.07	0.878402	8.78402	CHEMBL11	CN(C)CCCN1c2ccccc2CCc3ccccc13	1	17.568	25.6107	basic	280.415			9.17		4.36	2.35	4.415	2.49
183	indinavir		0.5	814.594	0	0.41	CHEMBL115	CC(C)(C)NC(=O)[C@@H]1CN(Cc2cccnc2)CCN1C[C@@H](O)C[C@@H](Cc3ccccc3)C(=O)N[C@@H]4[C@H](O)Cc5ccccc45	1	0.82	1.36543	neutral	613.803			6.4		3.44	3.43		2.9
184	indomethacin	0.3	4	11179.6	0.0291946	0.389261	CHEMBL6	COc1ccc2c(c1)c(CC(=O)O)c(C)n2C(=O)c3ccc(Cl)cc3	1	0.0973152	0.09623	acidic	357.793	3.96				4.25	0.98	3.585
185	isoniazid	5	20	145834	3.70608	14.8243	CHEMBL64	NNC(=O)c1ccncc1	1	0.741215	0.664778	neutral	137.142					-0.77	-0.77	-1.571	-0.57
186	isradipine	0.0005	0.01	26.9257	0.00075	0.015	CHEMBL1648	COC(=O)C1=C(C)NC(=C(C1c2cccc3nonc23)C(=O)OC(C)C)C	1	1.5	1.70997	neutral	371.393					3.73	3.73
187	ketorolac	0.5	5	19586.9	0.055	0.55	CHEMBL469	OC(=O)C1CCn2c1ccc2C(=O)c3ccccc3	1	0.11	0.155787	acidic	255.273	4.29				2.68	-0.34		-0.93
188	ketotifen	0.001	0.02	64.6341	0.00756176	0.151235	CHEMBL534	CN1CCC(=C2c3ccccc3CC(=O)c4sccc24)CC1	0		7.56176	basic	309.434			8.84		2.19	0.74
189	labetalol	0.03	1	3044.96	0.144	4.8	CHEMBL429	CC(CCc1ccccc1)NCC(O)c2ccc(O)c(c2)C(=O)N	1	4.8	5.45169	basic	328.412			9.3		2.72	0.83	3.09	1.06
190	lacosamide	1	20	79904.8	0.962095	19.2419	CHEMBL58323	COC[C@@H](NC(=O)C)C(=O)NCc1ccccc1	1		0.962095	neutral	250.298					0.73	0.73
191	lamotrigine	1	20	78095.7	1.53032	30.6063	CHEMBL741	Nc1nnc(c(N)n1)c2cccc(Cl)c2Cl	1		1.53032	neutral	256.096					1.24	1.24		1.38
192	levetiracetam	3	400	2.35001e+06	2.8147	375.294	CHEMBL1286	CC[C@H](N1CCCC1=O)C(=O)N	1		0.938234	neutral	170.212					-0.88	-0.88
193	levodopa	0.3	5	25356.3	0.51	8.5	CHEMBL1009	N[C@@H](Cc1ccc(O)c(O)c1)C(=O)O	1	1.7	0.89372	zwitterion	197.19	2.24		8.85		-1.15	-3.67	-3
194	levomepromazine	0.005	0.4	1217.73	0.0631636	5.05309	CHEMBL1764	COc1ccc2Sc3ccccc3N(C[C@H](C)CN(C)C)c2c1	0	12.6327	19.9443	basic	328.481			9.32		4.94	3.04		2.99
195	levomethadone	0.04	0.4	1292.6	0.308987	3.08987	CHEMBL159659	CCC(=O)C(C[C@@H](C)N(C)C)(c1ccccc1)c2ccccc2	0		7.72466	basic	309.453			9.05		3.93	2.29
196	levorphanol	0.007	0.1	388.535	0.0520476	0.743538	CHEMBL592	CN1CC[C@]23CCCC[C@H]2[C@H]1Cc4ccc(O)cc34	1		7.43538	basic	257.377			9.06		3.26	1.71
197	lidocaine	1	6	25603.5	1.00654	6.03926	CHEMBL79	CCN(CC)CC(=O)Nc1c(C)cccc1C	1	1.00654	1.35566	basic	234.343			7.96		2.2	1.67	2.26
198	lorazepam	0.02	0.3	934.105	0.0273853	0.41078	CHEMBL580	OC1N=C(c2ccccc2Cl)c3cc(Cl)ccc3NC1=O	1	1.36927	1.59736	neutral	321.163					2.38	2.38		2.38
199	lormetazepam	0.002	0.1	298.338	0.00386582	0.193291	CHEMBL399058	CN1C(=O)[C@H](O)N=C(c2ccccc2Cl)c3cc(Cl)ccc13	0		1.93291	neutral	335.19					2.35	2.35
200	loxapine	0.01	1	3050.5	0.0329736	3.29736	CHEMBL831	CN1CCN(CC1)C2=Nc3ccccc3Oc4ccc(Cl)cc24	1		3.29736	basic	327.815			8		2.41	2.23		3.24
201	lysergide	0.0005	0.001	3.09176	0.00236193	0.00472387	CHEMBL263881	CCN(CC)C(=O)[C@H]1CN(C)[C@@H]2Cc3c[nH]c4cccc(C2=C1)c34	0		4.72387	basic	323.44			7.41		2.71	2.37
202	maprotiline	0.075	0.22	793.047	3.29915	9.6775	CHEMBL21731	CNCCCC12CCC(c3ccccc13)c4ccccc24	1	43.9886	46.0273	basic	277.411			10.62		4.36	1.51		0.89
203	mebendazole		0.6	2031.85	0	0.72	CHEMBL685	COC(=O)Nc1nc2ccc(cc2[nH]1)C(=O)c3ccccc3	1	1.2	0.770904	neutral	295.298					2.83	2.83		2.9
204	medazepam	0.1	0.6	2215.96	0.280645	1.68387	CHEMBL28333	CN1CCN=C(c2ccccc2)c3cc(Cl)ccc13	0		2.80645	neutral	270.763					3.89	3.88
205	mefenamic acid	2	25	103610	0.722208	9.0276	CHEMBL686	Cc1cccc(Nc2ccccc2C(=O)O)c1C	1		0.361104	acidic	241.29	3.73				4.83	1.88		1.89
206	mefloquine	0.4	1.5	3964.94	1.28263	4.80988	CHEMBL416956	OC(C1CCCCN1)c2cc(nc3c(cccc23)C(F)(F)F)C(F)(F)F	1		3.20658	basic	378.316			9.24		2.2	0.5
207	melperone	0.03	0.2	759.428	0.42	2.8	CHEMBL1531134	CC1CCN(CCCC(=O)c2ccc(F)cc2)CC1	0	14	4.7412	basic	263.356			9.34		3.76	1.84
208	memantine	0.09	0.3	1673.11	0.611861	2.03954	CHEMBL807	CC12CC3CC(C)(C1)CC(N)(C3)C2	1		6.79845	basic	179.307			10.79		3	0.08		0.06
209	mepivacaine	0.4	5	20296	0.38	4.75	CHEMBL1087	CN1CCCCC1C(=O)Nc2c(C)cccc2C	0	0.95	1.4028	basic	246.354			8.29		1.78	1.28
210	meprobamate	5	10	45818.4	3.5	7	CHEMBL979	CCCC(C)(COC(=O)N)COC(=O)N	1	0.7	0.788409	neutral	218.253					0.7	0.7
211	mesoridazine	0.15	3	7760.24	1.57631	31.5262	CHEMBL1088	CN1CCCCC1CCN2c3ccccc3Sc4ccc(cc24)[S+](C)[O-]	1		10.5087	basic	386.586			9.84		3.16	0.76		1.6
212	metamizole	10	20	64233.7	3.02083	6.04166	CHEMBL461522	CN(CS(=O)(=O)O)C1=C(C)N(C)N(C1=O)c2ccccc2	0		0.302083	acidic	311.363	1.32				-1.27	-4.76
213	metformin	0.1	5	38709.6	0.100117	5.00586	CHEMBL1431	CN(C)C(=N)NC(=N)N	1	1.00117	1.01216	basic	129.167			12.25		-1.25	-3.24
214	methadone	0.05	0.2	646.302	0.231068	0.924273	CHEMBL651	CCC(=O)C(CC(C)N(C)C)(c1ccccc1)c2ccccc2	1	4.62136	7.72466	basic	309.453			9.05		3.93	2.29
215	methamphetamine		0.15	1005.11	0	0.645	CHEMBL1201201	CN[C@@H](C)Cc1ccccc1	1	4.3	5.11038	basic	149.237			10.38		2.2	-0.54
216	methapyrilene	0.1	4	15302.6	0.33	13.2	CHEMBL1411979	CN(C)CCN(Cc1cccs1)c2ccccn2	0	3.3	3.581	basic	261.394			8.9		2.78	0.96
217	methaqualone	1	3	11985.6	0.962763	2.88829	CHEMBL282052	CC1=Nc2ccccc2C(=O)N1c3ccccc3C	0		0.962763	neutral	250.301					2.5	2.5
218	methocarbamol	25	250	1.0363e+06	24.5595	245.595	CHEMBL1201117	COc1ccccc1OCC(O)COC(=O)N	1		0.982381	neutral	241.243					0.4	0.4		0.36
219	methohexital	1	2	7624.6	1.1	2.2	CHEMBL7413	CCC#CC(C)C1(CC=C)C(=O)NC(=O)N(C)C1=O	0	1.1	0.991238	neutral	262.309	7.82				2.01	1.88
220	methomyl		0.63	3883.76	0	0.57774	CHEMBL3085419	CNC(=O)ON=C(C)SC	0		0.917048	neutral	162.214					3.63	3.6
221	methotrexate	0.04	0.4	880.191	0.0172	0.172	CHEMBL34259	CN(Cc1cnc2nc(N)nc(N)c2n1)c3ccc(cc3)C(=O)N[C@@H](CCC(=O)O)C(=O)O	1	0.43	0.260582	acidic	454.447	3.31	4			-0.45	-5.1
222	methoxsalen	0.025	1	4625.52	0.0205072	0.820289	CHEMBL416	COc1c2OC(=O)C=Cc2cc3ccoc13	1		0.820289	neutral	216.192					1.52	1.52		1.97
223	methsuximide	10	40	196811	10.925	43.7001	CHEMBL697	CN1C(=O)CC(C)(C1=O)c2ccccc2	1		1.0925	neutral	203.241					0.42	0.42
224	methyldopa	1	9	42610.2	0.69	6.21	CHEMBL459	C[C@](N)(Cc1ccc(O)c(O)c1)C(=O)O	1	0.69	0.680795	zwitterion	211.217	2.28		10.6		-0.74	-3.26	-3
225	3,4-methylenedioxyamphetamine		1.5	8369.65	0	3.19993	CHEMBL6731	CC(N)Cc1ccc2OCOc2c1	0		2.13329	basic	179.219			9.94		1.64	-0.8
226	methylphenidate	0.01	0.1	428.612	0.022	0.22	CHEMBL796	COC(=O)C(C1CCCCN1)c2ccccc2	1	2.2	2.70018	basic	233.311			9.51		2.31	0.24
227	methyprylone		25	136425	0	33.2327	CHEMBL1200790	CCC1(CC)C(=O)NCC(C)C1=O	1		1.32931	neutral	183.251					0.65	0.65
228	metildigoxin	0.0005	0.0025	3.14475	0.000816366	0.00408183	CHEMBL1697843	CO[C@H]1[C@@H](O)C[C@H](O[C@H]2[C@@H](O)C[C@H](O[C@H]3[C@@H](O)C[C@H](O[C@H]4CC[C@@]5(C)[C@H](CC[C@@H]6[C@@H]5C[C@@H](O)[C@]7(C)[C@H](CC[C@]67O)C8=CC(=O)OC8)C4)O[C@@H]3C)O[C@@H]2C)O[C@@H]1C	0		1.63273	neutral	794.976					2.05	2.05
229	metoclopramide	0.05	0.2	667.107	0.165927	0.663708	CHEMBL86	CCN(CC)CCNC(=O)c1cc(Cl)c(N)cc1OC	1	3.31854	3.3172	basic	299.802			9.08		2.16	0.3		0.34
230	metoprolol	0.035	0.65	2431.1	0.12415	2.30564	CHEMBL13	COCCc1ccc(OCC(O)CNC(C)C)cc1	1	3.54714	3.39217	basic	267.369			9.43		1.63	-0.47	1.915
231	metronidazole	3	200	1.16852e+06	1.63218	108.812	CHEMBL137	Cc1ncc([N+](=O)[O-])n1CCO	1	0.544059	0.595701	neutral	171.156					-0.14	-0.14	-0.02	-0.11
232	mexiletine	0.7	2	11156.8	3.64905	10.4258	CHEMBL558	CC(N)COc1c(C)cccc1C	1	5.21292	4.73343	basic	179.263			9.13		2.12	0.92		0.62
233	mianserin	0.015	0.14	529.557	0.155086	1.44747	CHEMBL6437	CN1CCN2C(C1)c3ccccc3Cc4ccccc24	0		10.3391	basic	264.372			8.26		1.14	0.77
234	midazolam	0.04	1	3069.61	0.0484559	1.2114	CHEMBL655	Cc1ncc2CN=C(c3ccccc3F)c4cc(Cl)ccc4n12	1	1.2114	1.79976	neutral	325.774					3.8	3.78		3.4
235	milnacipran	0.05	0.22	893.024	0.127774	0.562206	CHEMBL259209	CCN(CC)C(=O)C1(CC1CN)c2ccccc2	1		2.55548	basic	246.354			10.36		0.83	-1.92
236	milrinone	0.15	0.3	1420.29	0.0375	0.075	CHEMBL189	CC1=C(C=C(C#N)C(=O)N1)c2ccncc2	0	0.25	0.343756	acidic	211.224	7.21				1.27	0.78
237	minoxidil	0.02	1.4	6690.47	0.06	4.2	CHEMBL802	Nc1cc(nc(N)[n+]1[O-])N2CCCCC2	1	3	2.69462	neutral	209.253					1.62	1.61		0.77
238	mirtazapine	0.03	1	3768.47	0.1347	4.48999	CHEMBL654	CN1CCN2C(C1)c3ccccc3Cc4cccnc24	1	4.48999	5.6601	basic	265.36			8.1		0.89	0.28		2.82
239	mitotane	14	20	62491	52.7363	75.3376	CHEMBL1670	ClC(Cl)C(c1ccc(Cl)cc1)c2ccccc2Cl	1		3.76688	neutral	320.046					5.41	5.41
240	moclobemide	0.3	2	7442.03	0.33	2.2	CHEMBL86304	Clc1ccc(cc1)C(=O)NCCN2CCOCC2	0	1.1	1.26882	neutral	268.744			6.53		1.34	1.27
241	modafinil	1	3.4	12437.9	0.79292	2.69593	CHEMBL1373	NC(=O)C[S+]([O-])C(c1ccccc1)c2ccccc2	1		0.79292	neutral	273.357					1.18	1.18		1.12
242	molindone	0.04	0.15	542.731	0.0909046	0.340892	CHEMBL460	CCc1c(C)[nH]c2CCC(CN3CCOCC3)C(=O)c12	1		2.27261	neutral	276.38			6.57		-1.32	-1.38		1.54
243	morphine	0.01	0.1	350.455	0.0267638	0.267638	CHEMBL70	CN1CC[C@]23[C@H]4Oc5c(O)ccc(C[C@@H]1[C@@H]2C=C[C@@H]4O)c35	1	2.67638	3.46498	basic	285.343			8.25		0.87	0.04
244	nalidixic acid	10	40	172236	3.90441	15.6176	CHEMBL5	CCN1C=C(C(=O)O)C(=O)c2ccc(C)nc12	1		0.390441	acidic	232.239	3.45				0.03	-1.54		-0.1
245	naproxen	20	200	868572	3.2	32	CHEMBL154	COc1ccc2cc(ccc2c1)[C@H](C)C(=O)O	1	0.16	0.126551	acidic	230.263	4.85				2.88	0.35	3.30667	0.13
246	nebivolol		0.48	1183.9	0	5.32778	CHEMBL434394	OC(CNCC(O)C1CCc2cc(F)ccc2O1)C3CCc4cc(F)ccc4O3	1	11.0995	6.79123	basic	405.441			8.65		4.08	2.75
247	nefazodone	0.01	5.5	11701.7	0.0051	2.805	CHEMBL623	CCC1=NN(CCCN2CCN(CC2)c3cccc(Cl)c3)C(=O)N1CCOc4ccccc4	1	0.51	0.827025	basic	470.017			7.65		4.09	3.89
248	nefopam	0.01	4	15788.7	0.0636302	25.4521	CHEMBL465026	CN1CCOC(c2ccccc2)c3ccccc3C1	0	6.36302	7.38454	basic	253.345			9.16		1.91	0.16
249	nicotine	0.005	0.4	2465.54	0.013	1.04	CHEMBL3	CN1CCC[C@H]1c2cccnc2	1	2.6	2.70008	basic	162.236			8		0.57	-0.62	1.17
250	nifedipine	0.025	0.15	433.102	0.019583	0.117498	CHEMBL193	COC(=O)C1=C(C)NC(=C(C1c2ccccc2[N+](=O)[O-])C(=O)OC)C	1	0.783319	1.14693	neutral	346.339					3.58	3.58		3.29
251	nitrazepam	0.03	0.2	711.058	0.051	0.34	CHEMBL13209	[O-][N+](=O)c1ccc2NC(=O)CN=C(c3ccccc3)c2c1	0	1.7	1.45534	neutral	281.271					2.36	2.36
252	nitrofurantoin	0.5	3	12596.6	0.285	1.71	CHEMBL572	[O-][N+](=O)c1oc(\C=N\N2CC(=O)NC2=O)cc1	1	0.57	0.510814	neutral	238.159	7.55				-0.47	-0.7	-0.47
253	nomifensine	0.01	8	33566.3	0.06	48	CHEMBL273575	CN1CC(c2ccccc2)c3cccc(N)c3C1	0	6	3.53969	basic	238.334			7.85		1.01	0.32		2.08
254	nordazepam	0.02	1.5	5540.8	0.0107331	0.804984	CHEMBL523	Clc1ccc2NC(=O)CN=C(c3ccccc3)c2c1	0	0.536656	1.30428	neutral	270.719					2.78	2.78
255	nortriptyline	0.02	0.3	1139.02	0.419749	6.29623	CHEMBL445	CNCCC=C1c2ccccc2CCc3ccccc13	1	20.9874	13.8477	basic	263.384			10		3.97	1.49		1.58
256	ofloxacin	2.5	30	83016.7	4.1447	49.7364	CHEMBL4	CC1COc2c(N3CCN(C)CC3)c(F)cc4C(=O)C(=CN1c24)C(=O)O	1	1.65788	1.61073	zwitterion	361.373	5.69		8.1		1.86	-0.39		-0.45
257	olanzapine	0.02	0.15	480.089	0.132568	0.994258	CHEMBL715	CN1CCN(CC1)C2=Nc3ccccc3Nc4sc(C)cc24	1		6.62839	basic	312.442			7.78		3.08	2.35		2.19
258	opipramol	0.05	1	2750.99	0.574762	11.4952	CHEMBL370753	OCCN1CCN(CCCN2c3ccccc3C=Cc4ccccc24)CC1	0		11.4952	basic	363.505			7.45		3.27	2.9
259	orphenadrine	0.1	1.7	6310.6	0.650882	11.065	CHEMBL900	CN(C)CCOC(c1ccccc1)c2ccccc2C	1		6.50882	basic	269.388			8.72		3.33	1.99		1.47
260	oxazepam	0.2	2	6975.5	0.118	1.18	CHEMBL568	OC1N=C(c2ccccc2)c3cc(Cl)ccc3NC1=O	1	0.59	1.23892	neutral	286.718					2.22	2.22	2.24
261	oxcarbazepine	10	45	178378	9.20482	41.4217	CHEMBL1068	NC(=O)N1c2ccccc2CC(=O)c3ccccc13	1		0.920482	neutral	252.273					1.66	1.66		1.28
262	oxprenolol	0.05	2	7537.13	0.103345	4.1338	CHEMBL546	CC(C)NCC(O)COc1ccccc1OCC=C	1		2.0669	basic	265.353			9.44		2.15	0.05	2.1	0.2
263	oxycodone	0.005	0.2	634.178	0.0119896	0.479583	CHEMBL656	COc1ccc2C[C@H]3N(C)CC[C@@]45[C@@H](Oc1c24)C(=O)CC[C@@]35O	1	2.39792	3.18698	basic	315.369			8.6		1.59	1.13
264	oxyphenbutazone	25	200	616561	7.99908	63.9927	CHEMBL1228	CCCCC1C(=O)N(N(C1=O)c2ccc(O)cc2)c3ccccc3	1		0.319963	acidic	324.38	5.08				2.74	0.47
265	oxypurinol	5	20	131481	2.65104	10.6042	CHEMBL859	O=C1NC(=O)c2c[nH]nc2N1	0		0.530209	neutral	152.113					-0.26	-0.26
266	paliperidone	0.02	0.12	281.365	0.0516975	0.310185	CHEMBL1621	CC1=C(CCN2CCC(CC2)c3noc4cc(F)ccc34)C(=O)N5CCCC(O)C5=N1	1		2.58487	basic	426.492			8.07		1.41	0.61
267	paracetamol	5	100	661529	4.84846	96.9693	CHEMBL112	CC(=O)Nc1ccc(O)cc1	1	0.969693	0.977388	neutral	151.165					0.48	0.47	0.425	0.25
268	paraldehyde	10	200	1.51333e+06	19.531	390.62	CHEMBL1410743	CC1OC(C)OC(C)O1	0		1.9531	neutral	132.159					1.02	1.02
269	paraoxon		0.005	18.1688	0	0.00286495	CHEMBL23838	CCOP(=O)(OCC)Oc1ccc(cc1)[N+](=O)[O-]	0		0.572991	neutral	275.197					2.11	2.11
270	parathion		0.01	34.333	0	0.0067846	CHEMBL261919	CCOP(=S)(OCC)Oc1ccc(cc1)[N+](=O)[O-]	0		0.67846	neutral	291.265					3.84	3.84
271	paroxetine		0.35	1062.63	0	6.15841	CHEMBL490	Fc1ccc(cc1)[C@@H]2CCNC[C@H]2COc3ccc4OCOc4c3	1	17.5955	14.4385	basic	329.371			9.68		3.7	1.48		1.78
272	pefloxacin	1	25	74993.3	1.5	37.5	CHEMBL267648	CCN1C=C(C(=O)O)C(=O)c2cc(F)c(cc12)N3CCN(C)CC3	0	1.5	2.00306	zwitterion	333.363	0.16		7.41		1.92	-0.17
273	pentachlorophenol		30	112639	0	94.3822	CHEMBL75967	Oc1c(Cl)c(Cl)c(Cl)c(Cl)c1Cl	0		3.14607	acidic	266.338	4.68				5.12	2.53
274	pentamidine	0.3	0.8	2349.99	15.9	42.4	CHEMBL55	NC(=N)c1ccc(OCCCCCOc2ccc(cc2)C(=N)N)cc1	0	53	21.7378	basic	340.427			12.5	9	2.85	-0.15
275	pentazocine	0.01	1	3503.47	0.034	3.4	CHEMBL560	C[C@H]1[C@H]2Cc3ccc(O)cc3[C@]1(C)CCN2CC=C(C)C	1	3.4	8.67086	basic	285.431			8.94		4.15	2.61
276	pentobarbital	1	10	44193.8	0.953939	9.53939	CHEMBL448	CCCC(C)C1(CC)C(=O)NC(=O)NC1=O	1	0.953939	0.953662	neutral	226.276	7.93				2.18	2.07
277	perazine	0.02	0.5	1472.72	0.553297	13.8324	CHEMBL1697766	CN1CCN(CCCN2c3ccccc3Sc4ccccc24)CC1	0		27.6648	basic	339.508			7.66		4.15	3.54
278	perhexiline	0.11	0.6	2162.19	1.34502	7.33646	CHEMBL75880	C(C(C1CCCCC1)C2CCCCC2)C3CCCCN3	0		12.2274	basic	277.496			10.52		6.47	3.66		3.02
279	perphenazine	0.0006	0.005	12.3769	0.0113842	0.0948683	CHEMBL567	OCCN1CCN(CCCN2c3ccccc3Sc4ccc(Cl)cc24)CC1	1	18.9737	24.4693	basic	403.979			7.8		3.94	3.6	4.2	3.6
280	pethidine	0.1	1	4043.05	0.255948	2.55948	CHEMBL607	CCOC(=O)C1(CCN(C)CC1)c2ccccc2	1	2.55948	3.1494	basic	247.338			8.5		2.19	1.62		1.4
281	phenacetin	5	50	278988	7	70	CHEMBL16073	CCOc1ccc(NC(=O)C)cc1	0	1.4	1.59976	neutral	179.219					1.66	1.66		1.5
282	phenazone	5	50	265632	3.3148	33.148	CHEMBL277474	CN1N(C(=O)C=C1C)c2ccccc2	0	0.66296	0.772594	neutral	188.23					0.44	0.44	0.35	0.17
283	phencyclidine	0.01	0.007	28.76	0.069	0.0483	CHEMBL275528	C1CCN(CC1)C2(CCCCC2)c3ccccc3	0	6.9	8.89245	basic	243.394			8.21		4.25	3.38
284	phenelzine	0.001	0.5	3671.13	0.00170171	0.850856	CHEMBL1089	NNCCc1ccccc1	1		1.70171	basic	136.198			8.02		0.3	-0.51		-0.01
285	pheneturide		5	24243	0	3.86378	CHEMBL2107062	CCC(C(=O)NC(=O)N)c1ccccc1	0		0.772756	neutral	206.245					1.62	-0.04
286	phenformin	0.03	0.6	2923.05	0.0468908	0.937815	CHEMBL170988	NC(=N)NC(=N)NCCc1ccccc1	0		1.56303	basic	205.265			12.15		-0.64	-2.63
287	phenmetrazine	0.02	0.5	2820.92	0.0631468	1.57867	CHEMBL1201208	CC1NCCOC1c2ccccc2	1		3.15734	basic	177.247			8.58		1.74	0.54
288	phenobarbital	10	30	129177	5.68472	17.0542	CHEMBL40	CCC1(C(=O)NC(=O)NC1=O)c2ccccc2	0	0.568472	0.603226	neutral	232.239	7.58				0.53	0.31	1.47	0.05
289	phenprocoumon	0.16	5	17836.6	0.143412	4.48162	CHEMBL16694	CCC(C1=C(O)Oc2ccccc2C1=O)c3ccccc3	1		0.896324	acidic	280.323	4.5				4.15	1.35
290	phensuximide	4	80	422802	4.06661	81.3322	CHEMBL797	CN1C(=O)CC(C1=O)c2ccccc2	1		1.01665	neutral	189.214					0.04	0.04		0.68
291	phentermine	0.03	0.9	6030.68	0.132459	3.97377	CHEMBL1574	CC(C)(N)Cc1ccccc1	1		4.4153	basic	149.237			9.94		2.2	-0.24
292	phenylbutazone	50	120	389129	24.3273	58.3856	CHEMBL101	CCCCC1C(=O)N(N(C1=O)c2ccccc2)c3ccccc3	1		0.486546	acidic	308.381	4.64				3.38	1.07	3.22	0.635
293	phenylpropanolamine	0.1	2	13226.7	0.165867	3.31735	CHEMBL61006	CC(N)C(O)c1ccccc1	1		1.65867	basic	151.209			8.47		0.36	-1.52
294	phenytoin	5	20	79279.2	3.2	12.8	CHEMBL16	O=C1NC(=O)C(N1)(c2ccccc2)c3ccccc3	1	0.64	0.625525	neutral	252.273	8.28				1.42	1.38	2.26	2.41
295	pimozide	0.004	0.02	43.3317	0.0203333	0.101666	CHEMBL1423	Fc1ccc(cc1)C(CCCN2CCC(CC2)N3C(=O)Nc4ccccc34)c5ccc(F)cc5	1		5.08332	basic	461.556			9.26		5.76	4.37
296	pindolol	0.02	0.7	2818.88	0.0285025	0.997587	CHEMBL500	CC(C)NCC(O)COc1cccc2[nH]ccc12	1	1.42512	1.71098	basic	248.326			9.62		1.68	-0.5	1.75	-0.12
297	pipamperone	0.1	0.5	1331.6	0.392966	1.96483	CHEMBL440294	NC(=O)C1(CCN(CCCC(=O)c2ccc(F)cc2)CC1)N3CCCCC3	0		3.92966	basic	375.488			8.08	7	2.47	1.62
298	pipotiazine	0.001	0.1	210.225	0.00429821	0.429821	CHEMBL398880	CN(C)S(=O)(=O)c1ccc2Sc3ccccc3N(CCCN4CCC(CCO)CC4)c2c1	0		4.29821	basic	475.68			9.19		4.81	3.03
299	piroxicam	2	14	42251	0.28	1.96	CHEMBL527	CN1C(=C(O)c2ccccc2S1(=O)=O)C(=O)Nc3ccccn3	1	0.14	0.131725	acidic	331.353	5.29				0.59	-2.27	2.34
300	pramipexole	0.0002	0.015	70.9777	0.000440317	0.0330238	CHEMBL301265	CCCN[C@H]1CCc2nc(N)sc2C1	1		2.20158	basic	211.334			9.47		2.35	0.38		3.15
301	prazepam	0.2	1	3078.71	0.46632	2.3316	CHEMBL969	Clc1ccc2N(CC3CC3)C(=O)CN=C(c4ccccc4)c2c1	1		2.3316	neutral	324.811					3.7	3.7
302	prazosin	0.001	0.9	2347.37	0.000709426	0.638483	CHEMBL2	COc1cc2nc(nc(N)c2cc1OC)N3CCN(CC3)C(=O)c4occc4	1	0.709426	0.894771	neutral	383.408			6.52		2.14	2.09		1.9
303	pregabalin	2	10	62802.6	0.695449	3.47724	CHEMBL1059	CC(C)C[C@H](CN)CC(=O)O	1		0.347724	zwitterion	159.229	4.23		11.31		1.09	-1.41
304	prilocaine	0.5	5	22694.7	1.85	18.5	CHEMBL1194	CCCNC(C)C(=O)Nc1ccccc1C	0	3.7	3.3753	basic	220.316			7.95		2.03	1.61
305	primidone	4	20	91635.5	3.86539	19.327	CHEMBL856	CCC1(C(=O)NCNC1=O)c2ccccc2	1		0.966349	neutral	218.256					0.83	0.83
306	procaine	0.2	15	63474.6	0.421129	31.5847	CHEMBL569	CCN(CC)CCOC(=O)c1ccc(N)cc1	0		2.10565	basic	236.315			9.24		2.26	0.42	2.14	0
307	procainamide	2.5	10	42493.3	5.11126	20.445	CHEMBL640	CCN(CC)CCNC(=O)c1ccc(N)cc1	1	2.0445	2.20973	basic	235.331			9.29		1.32	-0.56		-0.92
308	prochlorperazine	0.01	0.2	534.827	0.22	4.4	CHEMBL728	CN1CCN(CCCN2c3ccccc3Sc4ccc(Cl)cc24)CC1	1	22	32.2633	basic	373.953			8.1		4.65	4.04		3.92
309	procyclidine	0.08	1	3478.9	0.0592	0.74	CHEMBL86715	OC(CCN1CCCC1)(C2CCCCC2)c3ccccc3	1	0.74	8.39824	basic	287.447			10.49		3.86	1.08		1.78
310	promazine	0.01	1	3515.83	0.0779423	7.79423	CHEMBL564	CN(C)CCCN1c2ccccc2Sc3ccccc13	1	7.79423	19.3338	basic	284.428			9.43		4.69	2.73		2.56
311	promethazine	0.05	1	3515.83	0.7	14	CHEMBL643	CC(CN1c2ccccc2Sc3ccccc13)N(C)C	1	14	19.3759	basic	284.428			8.99		4.89	3.4		2.67
312	propafenone	0.04	1.1	3221.55	0.119205	3.27813	CHEMBL631	CCCNCC(O)COc1ccccc1C(=O)CCc2ccccc2	1	2.98012	3.29418	basic	341.451			9.31		3.35	1.37		1.72
313	propranolol	0.02	0.5	1927.9	0.0734444	1.83611	CHEMBL27	CC(C)NCC(O)COc1cccc2ccccc12	1	3.67222	3.48222	basic	259.349			9.5		2.9	0.79	3.31333
314	propylhexedrine	0.01	0.5	3219.89	0.0487256	2.43628	CHEMBL2105275	CNC(C)CC1CCCCC1	0		4.87256	basic	155.285			9.12		3.95	2.13
315	prothipendyl	0.005	0.02	70.0732	0.0393057	0.157223	CHEMBL2111030	CN(C)CCCN1c2ccccc2Sc3cccnc13	0		7.86114	neutral	285.416			7.22		0.48	0.16
316	protriptyline	0.05	0.5	1898.37	0.765226	7.65226	CHEMBL668	CNCCCC1c2ccccc2C=Cc3ccccc13	1		15.3045	basic	263.384			10.61		4.36	1.51
317	psilocin	0.008	0.018	88.1174	0.0198788	0.0447274	CHEMBL65547	CN(C)CCc1c[nH]c2cccc(O)c12	0		2.48486	basic	204.273			9.38		1.46	-0.32
318	quetiapine	0.1	1	2607.45	0.507888	5.07888	CHEMBL716	OCCOCCN1CCN(CC1)C2=Nc3ccccc3Sc4ccccc24	1		5.07888	neutral	383.517			6.74		2.6	2.51
319	quinidine	1	6	18494.3	3.08219	18.4931	CHEMBL21578	COc1ccc2nccc([C@H](O)[C@H]3CC4CCN3C[C@@H]4C=C)c2c1	1	3.08219	4.09639	basic	324.424			9.28		2.82	0.98
320	quinine	1	10	30823.9	1.7307	17.307	CHEMBL170	COc1ccc2nccc([C@@H](O)[C@@H]3C[C@@H]4CCN3C[C@@H]4C=C)c2c1	0	1.7307	4.09639	basic	324.424			9.28		2.82	0.98	1.83	-1.27
321	reboxetine	0.06	0.7	2233.59	0.039	0.455	CHEMBL14370	CCOc1ccccc1OC(C2CNCCO2)c3ccccc3	0	0.65	1.0915	basic	313.397			8.38		2.45	1.44
322	rifampicin	0.1	204	247888	0.097	197.88	CHEMBL374478	CO[C@H]1\C=C\O[C@@]2(C)Oc3c(C)c(O)c4c(O)c(NC(=O)\C(=C/C=C/[C@H](C)[C@H](O)[C@@H](C)[C@@H](O)[C@@H](C)[C@H](OC(=O)C)[C@@H]1C)\C)c(\C=N\N5CCN(C)CC5)c(O)c4c3C2=O	1	0.97	1.01595	neutral	822.953			7.3		2.05	-0.46
323	risperidone	0.002	0.12	292.331	0.0022	0.132	CHEMBL85	CC1=C(CCN2CCC(CC2)c3noc4cc(F)ccc34)C(=O)N5CCCCC5=N1	1	1.1	1.67316	basic	410.493			8.49		2.68	1.89		2.05
324	rivastigmine	0.008	0.04	159.781	0.0135292	0.0676461	CHEMBL636	CCN(C)C(=O)Oc1cccc(c1)[C@H](C)N(C)C	1	1.69115	1.99597	basic	250.342			8.62		2.06	0.85
325	ropinirole	0.0004	0.012	46.0863	0.00110715	0.0332145	CHEMBL589	CCCN(CCC)CCc1cccc2NC(=O)Cc12	1		2.76787	basic	260.381			9.45		2.49	0.49		0.76
326	ropivacaine		1	3644.21	0	0.642262	CHEMBL1077896	CCCN1CCCC[C@H]1C(=O)Nc2c(C)cccc2C	0	0.642262	1.06276	basic	274.408			8.12		2.8	2.42
327	rufinamid	5	40	167928	3.54201	28.3361	CHEMBL1201754	NC(=O)c1cn(Cc2c(F)cccc2F)nn1	1		0.708403	neutral	238.197					1	1
328	salbutamol	0.004	0.03	125.358	0.0076	0.057	CHEMBL714	CC(C)(C)NCC(O)c1ccc(O)c(CO)c1	1	1.9	2.07546	basic	239.315			9.62		0.69	-1.44
329	salicylic acid	20	300	2.17199e+06	3.4	51	CHEMBL424	OC(=O)c1ccccc1O	0	0.17	0.185098	acidic	138.122	3.01				2.01	-1.14	2.23	-1.99
330	secbutabarbital	5	20	94228.9	4.3718	17.4872	CHEMBL449	CCC(C)C1(CC)C(=O)NC(=O)NC1=O	1		0.87436	neutral	212.249	7.93				1.67	1.56
331	secobarbital	1.5	7	29376.3	1.44271	6.73262	CHEMBL447	CCCC(C)C1(CC=C)C(=O)NC(=O)NC1=O	1		0.961804	neutral	238.287	7.81				2.3	2.16
332	sertindole	0.05	0.2	453.566	0.238632	0.954528	CHEMBL12713	Fc1ccc(cc1)n2cc(C3CCN(CCN4CCNC4=O)CC3)c5cc(Cl)ccc25	0		4.77264	basic	440.95			8.98		3.67	2.47
333	sertraline	0.01	0.29	946.982	0.0958137	2.7786	CHEMBL809	CN[C@H]1CC[C@@H](c2ccc(Cl)c(Cl)c2)c3ccccc13	1		9.58137	basic	306.236			9.47		5.08	3.04		3.15
334	sotalol	0.5	7.5	27536.1	0.575016	8.62524	CHEMBL471	CC(C)NCC(O)c1ccc(NS(=O)(=O)C)cc1	1	1.15003	1.16766	basic	272.37	8.28		9.31		0.24	-1.68
335	stiripentol	1	15	64021.9	2.28197	34.2295	CHEMBL1983350	CC(C)(C)C(O)\C=C\c1ccc2OCOc2c1	0		2.28197	neutral	234.295					4.92	4.92
336	strychnine		0.075	224.27	0	0.33201	CHEMBL227934	O=C1C[C@@H]2OCC=C3CN4CC[C@@]56[C@@H]4C[C@@H]3[C@@H]2[C@@H]5N1c7ccccc67	0		4.42679	basic	334.419			8.37		1.59	0.55
337	sulfamethoxazole	30	200	789631	9	60	CHEMBL443	Cc1onc(NS(=O)(=O)c2ccc(N)cc2)c1	1	0.3	0.243288	acidic	253.283	5.81				0.66	-0.54		-0.56
338	sulpiride	0.05	1	2928.83	0.130384	2.60768	CHEMBL26	CCN1CCCC1CNC(=O)c2cc(ccc2OC)S(=O)(=O)N	0	2.60768	2.21217	basic	341.433			8.97		0.78	-1.08		-1.2
339	sultiam	0.5	12	41327.2	0.366937	8.8065	CHEMBL328560	NS(=O)(=O)c1ccc(cc1)N2CCCCS2(=O)=O	0		0.733875	neutral	290.366					0.56	0.56
340	tacrolimus	0.005	0.015	18.656	0.006	0.018	CHEMBL269732	CO[C@@H]1C[C@@H](CC[C@H]1O)\C=C(/C)\[C@H]2OC(=O)[C@@H]3CCCCN3C(=O)C(=O)[C@]4(O)O[C@H]([C@H](C[C@@H](C)C\C(=C\[C@@H](CC=C)C(=O)C[C@H](O)[C@H]2C)\C)OC)[C@H](C[C@H]4C)OC	1	1.2	0.864163	neutral	804.031					7.76	7.76
341	temazepam	0.02	1	3325.08	0.028157	1.40785	CHEMBL967	CN1C(=O)C(O)N=C(c2ccccc2)c3cc(Cl)ccc13	1		1.40785	neutral	300.745					2.19	2.19
342	terfenadine		0.04	84.8024	0	0.27864	CHEMBL17157	CC(C)(C)c1ccc(cc1)C(O)CCCN2CCC(CC2)C(O)(c3ccccc3)c4ccccc4	0		6.96601	basic	471.685			9.42		5.62	3.61		3.99
343	tetracycline	1	30	67500.7	1.2	36	CHEMBL1440	CN(C)[C@H]1[C@@H]2C[C@H]3C(=C(O)[C@]2(O)C(=O)C(=C1O)C(=O)N)C(=O)c4c(O)cccc4[C@@]3(C)O	1	1.2	1.06386	zwitterion	444.44	4.5		11.02		0.62	-2.23
344	theobromine	10	20	111008	5.08492	10.1698	CHEMBL1114	CN1C(=O)NC(=O)c2c1ncn2C	0		0.508492	neutral	180.167					-1.06	-1.06
345	theophylline	5	20	111008	2.69583	10.7833	CHEMBL190	CN1C(=O)N(C)c2nc[nH]c2C1=O	1	0.539166	0.518967	neutral	180.167					-0.02	-0.05	-0.4	-0.435
346	thiamphenicol	0.5	20	56144	0.522489	20.8995	CHEMBL1236282	CS(=O)(=O)c1ccc(cc1)[C@@H](O)[C@@H](CO)NC(=O)C(Cl)Cl	0		1.04498	neutral	356.227					-0.27	-0.27
347	thiopental	1	7	28884.6	1.2	8.4	CHEMBL441	CCCC(C)C1(CC)C(=O)NC(=S)NC1=O	0	1.2	1.10216	acidic	242.344	7.11				3.05	2.59	2.5	2.44
348	thioproperazine	0.001	0.1	223.893	0.00282745	0.282745	CHEMBL609109	CN(C)S(=O)(=O)c1ccc2Sc3ccccc3N(CCCN4CCN(C)CC4)c2c1	0		2.82745	basic	446.642			7.66		4.26	3.66
349	thioridazine	0.1	2.5	6746.05	2.63886	65.9716	CHEMBL479	CSc1ccc2Sc3ccccc3N(CCC4CCCCN4C)c2c1	1		26.3886	basic	370.587			9.84		5.9	3.5		3.76
350	tiagabine	0.01	0.5	1331.35	0.011	0.55	CHEMBL1027	Cc1ccsc1C(=CCCN2CCC[C@H](C2)C(=O)O)c3sccc3C	1	1.1	0.760765	zwitterion	375.559	3.86		9.62		4.03	1.53		1.49
351	tiapride		4	12179	0	7.12888	CHEMBL84158	CCN(CC)CCNC(=O)c1cc(ccc1OC)S(=O)(=O)C	0		1.78222	basic	328.434			9.08		1.22	-0.68		-0.9
352	tiotixene	0.001	0.1	225.409	0.00385904	0.385904	CHEMBL1201	CN(C)S(=O)(=O)c1ccc2Sc3ccccc3\C(=C\CCN4CCN(C)CC4)\c2c1	1		3.85904	basic	443.638			8.5		3.72	3.2		3.16
353	tocainide	4	13	67616.1	7.04755	22.9045	CHEMBL222944	C[C@@H](N)C(=O)Nc1c(C)cccc1C	0		1.76189	basic	192.262			8.1		0.81	0.37
354	tolbutamide	45	400	1.47954e+06	5.68472	50.5309	CHEMBL782	CCCCNC(=O)NS(=O)(=O)c1ccc(C)cc1	1	0.126327	0.131998	acidic	270.354	5.2				2.36	0.47	2.34	0.44
355	tolcapone		12	43916.8	0	1.44	CHEMBL1324	Cc1ccc(cc1)C(=O)c2cc(O)c(O)c(c2)[N+](=O)[O-]	1	0.12	0.489647	acidic	273.244	4.78				3.02	0.76		0.74
356	tolperisone	0.09	0.7	2852.88	0.354377	2.75627	CHEMBL1076211	CC(CN1CCCCC1)C(=O)c2ccc(C)cc2	0		3.93752	basic	245.366			8.47		3.01	1.91		1.65
357	topiramate	2	16	47146.7	2.58425	20.674	CHEMBL220492	CC1(C)O[C@@H]2CO[C@@]3(COS(=O)(=O)N)OC(C)(C)O[C@H]3[C@@H]2O1	1		1.29213	neutral	339.366					2.16	2.15
358	tramadol	0.1	1	3796.78	0.28	2.8	CHEMBL1237044	COc1cccc(c1)C2(O)CCCCC2CN(C)C	1	2.8	3.65362	basic	263.381			9.61		2.32	0.29
359	tranylcypromine		0.1	750.785	0	0.377608	CHEMBL1179	N[C@@H]1C[C@H]1c2ccccc2	0		3.77608	basic	133.194			8.24		1.47	0.58
360	trazodone	0.7	1.2	3226.92	0.504777	0.865332	CHEMBL621	Clc1cccc(c1)N2CCN(CCCN3N=C4C=CC=CN4C3=O)CC2	1	0.72111	0.947457	basic	371.872			7.52		2.76	2.58		2.67
361	triazolam	0.002	0.04	116.544	0.00124676	0.0249351	CHEMBL646	Cc1nnc2CN=C(c3ccccc3Cl)c4cc(Cl)ccc4n12	1	0.623378	0.893776	neutral	343.217					2.08	2.08		2.34
362	2,2,2-trichloroethanol	5	40	267730	13.0849	104.679	CHEMBL1171	OCC(Cl)(Cl)Cl	0		2.61698	neutral	149.404					0.97	0.97
363	2,4,5-trichlorophenoxyacetic acid		100	391414	0	21.5531	CHEMBL194458	OC(=O)COc1cc(Cl)c(Cl)cc1Cl	0		0.215531	acidic	255.484	2.88				3.1	-0.58
364	trifluoperazine	0.001	0.1	245.396	0.00764208	0.764208	CHEMBL422	CN1CCN(CCCN2c3ccccc3Sc4ccc(cc24)C(F)(F)F)CC1	1		7.64208	basic	407.505			9.5		4.62	4.02	5.03	4.31
365	triflupromazine	0.03	0.3	851.245	0.199597	1.99597	CHEMBL570	CN(C)CCCN1c2ccccc2Sc3ccc(cc13)C(F)(F)F	1		6.65323	basic	352.425			9.4		5.16	3.22		3.59
366	trihexyphenidyl	0.05	0.5	1658.52	0.458099	4.58099	CHEMBL1490	OC(CCN1CCCCC1)(C2CCCCC2)c3ccccc3	1		9.16199	basic	301.474			9.31		4.39	2.5		2.68
367	trimethoprim	1.5	20	68888.8	2.33884	31.1845	CHEMBL22	COc1cc(Cc2cnc(N)nc2N)cc(OC)c1OC	1	1.55922	1.49135	neutral	290.323			7.13		0.59	0.47	0.91	0.63
368	trimipramine	0.01	0.6	2037.75	0.222711	13.3626	CHEMBL644	CC(CN(C)C)CN1c2ccccc2CCc3ccccc13	1	22.2711	34.1361	basic	294.442			9.38		4.71	2.77		2.95
369	valnoctamide	5	40	279271	12.2097	97.6777	CHEMBL1075733	CCC(C)C(CC)C(=O)N	0		2.44194	neutral	143.23					1.89	1.89
370	valproic acid	40	150	1.04012e+06	5.6	21	CHEMBL109	CCCC(CCC)C(=O)O	1	0.14	0.162673	acidic	144.214	4.82				2.58	0.02
371	varenicline	0.004	0.01	47.3332	0.00882221	0.0220555	CHEMBL1396	C1NCC2CC1c3cc4nccnc4cc23	1		2.20555	basic	211.268			9.6		1.01	-1.06
372	venlafaxine	0.1	1	3604.8	0.44	4.4	CHEMBL637	COc1ccc(cc1)C(CN(C)C)C2(O)CCCCC2	1	4.4	5.02606	basic	277.408			9.64		2.48	0.76		0.99
373	verapamil	0.01	1	2199.68	0.0439999	4.39999	CHEMBL6966	COc1ccc(CCN(C)CCCC(C#N)(C(C)C)c2ccc(OC)c(OC)c2)cc1OC	1	4.39999	4.62794	basic	454.611			8.6		4.02	2.46	4.06	2.61
374	vigabatrin	2	20	154848	0.626531	6.26531	CHEMBL89598	NC(CCC(=O)O)C=C	1		0.313266	zwitterion	129.159	4.36		10.61		-0.3	-2.8
375	vinylbital	1	5	22295.5	0.859063	4.29532	CHEMBL2105552	CCCC(C)C1(C=C)C(=O)NC(=O)NC1=O	0		0.859063	acidic	224.26	6.47				4.53	4.47
376	vitamin d	0.02	0.2	519.956	0.166966	1.66966	CHEMBL1042	CC(C)CCC[C@@H](C)[C@H]1CC[C@H]2\C(=C\C=C/3\C[C@@H](O)CCC3=C)\CCC[C@]12C	1		8.34831	neutral	384.648					9.09	9.09	10.24
377	voriconazole	2	3.5	10019.6	6.36239	11.1342	CHEMBL638	C[C@@H](c1ncncc1F)[C@](O)(Cn2cncn2)c3ccc(F)cc3F	1	3.18119	2.03984	neutral	349.316					1.21	1.21		1.7
378	warfarin	1	10	32432.5	0.133251	1.33251	CHEMBL1464	CC(=O)CC(C1=C(O)c2ccccc2OC1=O)c3ccccc3	1	0.133251	0.22488	acidic	308.333	4.5				3.13	0.33	3.54	0.86
379	zidovudine	0.1	2	7483.77	0.174929	3.49857	CHEMBL129	CC1=CN([C@H]2C[C@H](N=[N+]=[N-])[C@@H](CO)O2)C(=O)NC1=O	1	1.74929	1.38065	neutral	267.245					0.05	0.05
380	ziprasidone	0.05	0.4	968.65	0.05	0.4	CHEMBL708	Clc1cc2NC(=O)Cc2cc1CCN3CCN(CC3)c4nsc5ccccc45	1	1	1.52656	basic	412.946			8.25		2.97	2.29
381	zolpidem	0.08	0.5	1626.56	0.0432	0.27	CHEMBL911	CN(C)C(=O)Cc1c(nc2ccc(C)cn12)c3ccc(C)cc3	1	0.54	0.790614	neutral	307.397					3.09	3.03
382	zonisamide	10	40	188475	6.34185	25.3674	CHEMBL750	NS(=O)(=O)Cc1noc2ccccc12	1		0.634185	neutral	212.23					0.72	0.71		0.55
383	zopiclone	0.01	0.15	385.788	0.013	0.195	CHEMBL135400	CN1CCN(CC1)C(=O)OC2N(C(=O)c3nccnc23)c4ccc(Cl)cn4	0	1.3	1.08208	neutral	388.815			6.7		2.71	2.63		1.1
384	zotepine	0.01	0.3	903.974	0.0720275	2.16083	CHEMBL285802	CN(C)CCOC1=Cc2ccccc2Sc3ccc(Cl)cc13	0		7.20275	basic	331.868			8.72		5.43	4.1
385	zuclopenthixol	0.004	0.1	249.392	0.0690695	1.72674	CHEMBL87385	OCCN1CCN(CC\C=C\2/c3ccccc3Sc4ccc(Cl)cc24)CC1	0		17.2674	neutral	400.975			7.03		3.91	3.68
