# Supplementary material for: Designing safer oral drugs
Source: Royal Society of Chemistry journal article supplement (doi:10.1039/c6md00706f), 2017-01-01
Supplement: c6md00706f2.xlsx [file c6md00706f2.xlsx]

## Sheet: Data for Figure 8
Simulation	MolWt	Dose_Interval_hr	Study_Length_hr	Charge_Type	Absorption_Rate_Human_s-1	Bioavailability_Human_%	PPB_Human_% bound	Volume_Human_L/kg	Cl_In_Vivo_Human_Total_mL/min/kg	NOAEL_Human_Free_nM	Cmax_Human_Free_nM	Cmin_Human_Free_nM	Cmax_Cmin_Ratio_Human	Dose_Size_Estimated_mg
Sim 1	400	24	336	monoacid	0.00014	50	96	0.3	0.25	167	167	69.2338	2.41212	60.7727
Sim 2	400	24	336	monoacid	0.00014	50	96	0.3	4.5	167	167	0.00443094	37689.5	261.979
Sim 3	400	24	336	monoacid	0.00014	50	96	0.3	5	167	167	0.00377031	44293.4	279.193
Sim 4	400	24	336	monoacid	0.00014	50	96	0.3	5.5	167	167	0.00332873	50169.3	296.188
Sim 5	400	24	336	monoacid	0.00014	50	96	0.3	6	167	167	0.00301219	55441.5	312.992
Sim 6	400	24	336	monoacid	0.00014	50	96	0.3	6.5	167	167	0.00277382	60205.7	329.636
Sim 7	400	24	336	monoacid	0.00014	50	96	0.3	7	167	167	0.00258757	64539.2	346.133
Sim 8	400	24	336	monoacid	0.00014	50	96	0.3	7.5	167	167	0.00243786	68502.7	362.502
Sim 9	400	24	336	monoacid	0.00014	50	96	0.3	8	167	167	0.00231476	72145.7	378.756
Sim 10	400	24	336	monoacid	0.00014	50	96	0.3	8.5	167	167	0.00221167	75508.6	394.906
Sim 11	400	24	336	monoacid	0.00014	50	96	0.3	9	167	167	0.002124	78625.2	410.962
Sim 12	400	24	336	monoacid	0.00014	50	96	0.3	0.5	167	167	27.5477	6.06222	92.9639
Sim 13	400	24	336	monoacid	0.00014	50	96	0.3	9.5	167	167	0.00204848	81523.8	426.933
Sim 14	400	24	336	monoacid	0.00014	50	96	0.3	10	167	167	0.00198271	84228.3	442.825
Sim 15	400	24	336	monoacid	0.00014	50	96	0.3	1	167	167	4.15998	40.1444	127.087
Sim 16	400	24	336	monoacid	0.00014	50	96	0.3	1.5	167	167	0.655021	254.954	150.161
Sim 17	400	24	336	monoacid	0.00014	50	96	0.3	2	167	167	0.122323	1365.24	170.572
Sim 18	400	24	336	monoacid	0.00014	50	96	0.3	2.5	167	167	0.0320396	5212.3	189.89
Sim 19	400	24	336	monoacid	0.00014	50	96	0.3	3	167	167	0.0130984	12749.7	208.555
Sim 20	400	24	336	monoacid	0.00014	50	96	0.3	3.5	167	167	0.00767789	21750.8	226.721
Sim 21	400	24	336	monoacid	0.00014	50	96	0.3	4	167	167	0.00552836	30207.9	244.505
Sim 22	400	24	336	monobase	0.00014	50	76	3.7	0.25	81	81	73.0859	1.10829	8.91145
Sim 23	400	24	336	monobase	0.00014	50	76	3.7	0.5	81	81	69.49	1.16563	13.7782
Sim 24	400	24	336	monobase	0.00014	50	76	3.7	1	81	81	61.1093	1.32549	24.4489
Sim 25	400	24	336	monobase	0.00014	50	76	3.7	1.5	81	81	53.1084	1.52518	34.6138
Sim 26	400	24	336	monobase	0.00014	50	76	3.7	2	81	81	46.0151	1.76029	43.786
Sim 27	400	24	336	monobase	0.00014	50	76	3.7	2.5	81	81	39.8184	2.03424	52.0266
Sim 28	400	24	336	monobase	0.00014	50	76	3.7	3	81	81	34.4116	2.35386	59.4313
Sim 29	400	24	336	monobase	0.00014	50	76	3.7	3.5	81	81	29.7058	2.72674	66.1045
Sim 30	400	24	336	monobase	0.00014	50	76	3.7	4	81	81	25.6245	3.16104	72.1568
Sim 31	400	24	336	monobase	0.00014	50	76	3.7	4.5	81	81	22.0742	3.66944	77.62
Sim 32	400	24	336	monobase	0.00014	50	76	3.7	5	81	81	19.0039	4.26227	82.61
Sim 33	400	24	336	monobase	0.00014	50	76	3.7	5.5	81	81	16.3497	4.95421	87.181
Sim 34	400	24	336	monobase	0.00014	50	76	3.7	6	81	81	14.0545	5.76328	91.366
Sim 35	400	24	336	monobase	0.00014	50	76	3.7	6.5	81	81	12.0751	6.708	95.2326
Sim 36	400	24	336	monobase	0.00014	50	76	3.7	7	81	81	10.3725	7.80914	98.8478
Sim 37	400	24	336	monobase	0.00014	50	76	3.7	7.5	81	81	8.90215	9.09892	102.175
Sim 38	400	24	336	monobase	0.00014	50	76	3.7	8	81	81	7.63746	10.6056	105.286
Sim 39	400	24	336	monobase	0.00014	50	76	3.7	8.5	81	81	6.5525	12.3617	108.243
Sim 40	400	24	336	monobase	0.00014	50	76	3.7	9	81	81	5.61978	14.4134	111.024
Sim 41	400	24	336	monobase	0.00014	50	76	3.7	9.5	81	81	4.81932	16.8073	113.669
Sim 42	400	24	336	monobase	0.00014	50	76	3.7	10	81	81	4.13172	19.6044	116.169
Sim 43	400	24	336	neutral	0.00014	50	77	1.2	0.25	240	240	192.575	1.24627	19.5934
Sim 44	400	24	336	neutral	0.00014	50	77	1.2	0.5	240	240	155.5	1.54341	35.5133
Sim 45	400	24	336	neutral	0.00014	50	77	1.2	1	240	240	99.4977	2.41212	60.7568
Sim 46	400	24	336	neutral	0.00014	50	77	1.2	1.5	240	240	63.0046	3.80924	79.125
Sim 47	400	24	336	neutral	0.00014	50	77	1.2	2	240	240	39.5894	6.06222	92.9397
Sim 48	400	24	336	neutral	0.00014	50	77	1.2	2.5	240	240	24.7455	9.69875	103.776
Sim 49	400	24	336	neutral	0.00014	50	77	1.2	3	240	240	15.4231	15.561	112.694
Sim 50	400	24	336	neutral	0.00014	50	77	1.2	3.5	240	240	9.59699	25.0078	120.275
Sim 51	400	24	336	neutral	0.00014	50	77	1.2	4	240	240	5.97841	40.1444	127.054
Sim 52	400	24	336	neutral	0.00014	50	77	1.2	4.5	240	240	3.73736	64.2165	133.395
Sim 53	400	24	336	neutral	0.00014	50	77	1.2	5	240	240	2.34262	102.449	139.127
Sim 54	400	24	336	neutral	0.00014	50	77	1.2	5.5	240	240	1.47908	162.263	144.735
Sim 55	400	24	336	neutral	0.00014	50	77	1.2	6	240	240	0.941348	254.954	150.122
Sim 56	400	24	336	neutral	0.00014	50	77	1.2	6.5	240	240	0.60532	396.484	155.354
Sim 57	400	24	336	neutral	0.00014	50	77	1.2	7	240	240	0.394311	608.657	160.495
Sim 58	400	24	336	neutral	0.00014	50	77	1.2	7.5	240	240	0.260902	919.885	165.567
Sim 59	400	24	336	neutral	0.00014	50	77	1.2	8	240	240	0.175793	1365.24	170.528
Sim 60	400	24	336	neutral	0.00014	50	77	1.2	8.5	240	240	0.121017	1983.2	175.443
Sim 61	400	24	336	neutral	0.00014	50	77	1.2	9	240	240	0.0853474	2812.04	180.303
Sim 62	400	24	336	neutral	0.00014	50	77	1.2	9.5	240	240	0.0618091	3882.92	185.1
Sim 63	400	24	336	neutral	0.00014	50	77	1.2	10	240	240	0.0460449	5212.3	189.841
Sim 64	400	24	336	zwitterion	0.00014	50	37	0.9	0.25	875	875	655.104	1.33567	25.0617
Sim 65	400	24	336	zwitterion	0.00014	50	37	0.9	0.5	875	875	489.178	1.78871	44.7903
Sim 66	400	24	336	zwitterion	0.00014	50	37	0.9	1	875	875	267.81	3.26724	73.4917
Sim 67	400	24	336	zwitterion	0.00014	50	37	0.9	1.5	875	875	144.337	6.06222	92.7784
Sim 68	400	24	336	zwitterion	0.00014	50	37	0.9	2	875	875	77.0717	11.3531	106.724
Sim 69	400	24	336	zwitterion	0.00014	50	37	0.9	2.5	875	875	40.9787	21.3525	117.641
Sim 70	400	24	336	zwitterion	0.00014	50	37	0.9	3	875	875	21.7963	40.1444	126.833
Sim 71	400	24	336	zwitterion	0.00014	50	37	0.9	3.5	875	875	11.6523	75.0925	135.083
Sim 72	400	24	336	zwitterion	0.00014	50	37	0.9	4	875	875	6.2823	139.28	142.678
Sim 73	400	24	336	zwitterion	0.00014	50	37	0.9	4.5	875	875	3.432	254.954	149.861
Sim 74	400	24	336	zwitterion	0.00014	50	37	0.9	5	875	875	1.91039	458.021	156.829
Sim 75	400	24	336	zwitterion	0.00014	50	37	0.9	5.5	875	875	1.08963	803.022	163.617
Sim 76	400	24	336	zwitterion	0.00014	50	37	0.9	6	875	875	0.640913	1365.24	170.232
Sim 77	400	24	336	zwitterion	0.00014	50	37	0.9	6.5	875	875	0.391646	2234.16	176.772
Sim 78	400	24	336	zwitterion	0.00014	50	37	0.9	7	875	875	0.250164	3497.71	183.187
Sim 79	400	24	336	zwitterion	0.00014	50	37	0.9	7.5	875	875	0.167872	5212.3	189.511
Sim 80	400	24	336	zwitterion	0.00014	50	37	0.9	8	875	875	0.118624	7376.27	195.786
Sim 81	400	24	336	zwitterion	0.00014	50	37	0.9	8.5	875	875	0.0881554	9925.65	201.986
Sim 82	400	24	336	zwitterion	0.00014	50	37	0.9	9	875	875	0.0686292	12749.7	208.139
Sim 83	400	24	336	zwitterion	0.00014	50	37	0.9	9.5	875	875	0.0556352	15727.5	214.23
Sim 84	400	24	336	zwitterion	0.00014	50	37	0.9	10	875	875	0.0466587	18753.2	220.272
